# 1 **Conceptual framework of episodic disability in the context of** 2 **Long COVID: Findings from a community-engaged** 3 **international qualitative study**

## 4 5 Episodic Disability Framework in the Context of Long COVID

6  
7 Kelly K. O'Brien<sup>1,2,3,4\*</sup>, Darren A. Brown<sup>4,5</sup>, Kiera McDuff<sup>1</sup>, Natalie St. Clair-Sullivan<sup>6,7</sup>, Soo Chan  
8 Carusone<sup>8</sup>, Catherine Thomson<sup>4</sup>, Lisa McCorkell<sup>9</sup>, Hannah Wei<sup>9</sup>, Susie Goulding<sup>10</sup>, Margaret  
9 O'Hara<sup>11</sup>, Niamh Roche<sup>12,13</sup>, Ruth Stokes<sup>12,13</sup>, Mary Kelly<sup>4</sup>, Angela M. Cheung<sup>2,14,15</sup>, Kristine M.  
10 Erlandson<sup>16</sup>, Richard Harding<sup>7</sup>, Jaime H. Vera<sup>6,17</sup>, Colm Bergin<sup>18,19</sup>, Larry Robinson<sup>13,20</sup>, Lisa  
11 Avery<sup>2,21</sup>, Ciaran Bannan<sup>18,19</sup>, Brittany Torres<sup>1</sup>, Imelda O'Donovan<sup>13</sup>, Nisa Malli<sup>9</sup>, Patricia  
12 Solomon<sup>22</sup>

13  
14 <sup>1</sup> Department of Physical Therapy, Temerty Faculty of Medicine, University of Toronto,  
15 Toronto, Ontario, Canada

16 <sup>2</sup> Institute of Health Policy, Management and Evaluation (IHPE), Dalla Lana School of Public  
17 Health, University of Toronto, Toronto, Ontario, Canada

18 <sup>3</sup> Rehabilitation Sciences Institute (RSI), University of Toronto, Toronto, Ontario, Canada

19 <sup>4</sup> Long COVID Physio

20 <sup>5</sup> Chelsea and Westminster Hospital NHS Foundation Trust, London, United Kingdom

21 <sup>6</sup> Royal Sussex Hospital, Brighton and Sussex University Hospitals NHS Trust, Brighton, United  
22 Kingdom

23 <sup>7</sup> Florence Nightingale Faculty of Nursing Midwifery and Palliative Care, Cicely Saunders  
24 Institute, King's College London, London, United Kingdom

25 <sup>8</sup> McMaster Collaborative for Health and Aging, Faculty of Health Sciences, McMaster  
26 University, Hamilton, Ontario, Canada

27 <sup>9</sup> Patient-Led Research Collaborative, United States

28 <sup>10</sup> COVID Long-Haulers Support Group Canada, Canada

29 <sup>11</sup> Long Covid Support, United Kingdom

30 <sup>12</sup> Long COVID Ireland, Ireland

31 <sup>13</sup> Long COVID Advocacy Ireland

32 <sup>14</sup> Department of Medicine, University of Toronto, Toronto, Ontario, Canada

33 <sup>15</sup> Department of Medicine, University Health Network, Toronto, Ontario, Canada

34 <sup>16</sup> University of Colorado Denver-Anschutz Medical Campus, Aurora, Colorado, United States

35 <sup>17</sup> Department of Global Health and Infection, Brighton and Sussex Medical School, University  
36 of Sussex, Brighton, United Kingdom

37 <sup>18</sup> St. James's Hospital, GUIDE Clinic, Dublin, Ireland

38 <sup>19</sup> Trinity College Dublin, School of Medicine, Dublin, Ireland

39 <sup>20</sup> Sunnybrook Research Institute, Sunnybrook Health Sciences Centre, Toronto, Ontario,  
40 Canada

41 <sup>21</sup> Biostatistics Department, Princess Margaret Cancer Centre, University Health Network,  
42 Toronto, Ontario, Canada

43 <sup>22</sup> School of Rehabilitation Science, Faculty of Health Sciences, McMaster University, Hamilton,  
44 Ontario, Canada

45

46 **\*Corresponding Author:**

47 Email: [kelly.obrien@utoronto.ca](mailto:kelly.obrien@utoronto.ca) (KKO)

48 [ORCID ID: 0000-0002-1632-6537](https://orcid.org/0000-0002-1632-6537)

49

50 **Email Addresses and ORCID IDs of authors:**

51 Kelly K. O'Brien (KKO): [kelly.obrien@utoronto.ca](mailto:kelly.obrien@utoronto.ca); 0000-0002-1632-6537

52 Darren A. Brown (DAB): [darren.brown11@nhs.net](mailto:darren.brown11@nhs.net); 0000-0002-4956-243X

53 Kiera McDuff (KMcD): [kiera.mcduff@mail.utoronto.ca](mailto:kiera.mcduff@mail.utoronto.ca); 0000-0003-0331-6919

54 Natalie St. Clair-Sullivan (NSCS): [N.StClair-Sullivan@nhs.net](mailto:N.StClair-Sullivan@nhs.net); 0000-0003-1097-0759

55 Soo Chan Carusone (SCC): [chansy@mcmaster.ca](mailto:chansy@mcmaster.ca); 0000-0003-3977-0523

56 Catherine Thomson (CT): [catherine.thomson9@nhs.net](mailto:catherine.thomson9@nhs.net)

57 Lisa McCorkell (LMcC): [lisa@patientledresearch.com](mailto:lisa@patientledresearch.com); 0000-0002-3261-6737

58 Hannah Wei (HW): [hannah.wei@patientledresearch.com](mailto:hannah.wei@patientledresearch.com); 0000-0002-0307-7498

59 Susie Goulding (SG): [getaholdofsuzie@gmail.com](mailto:getaholdofsuzie@gmail.com)

60 Margaret O'Hara (MOH): [mohara74@gmail.com](mailto:mohara74@gmail.com); 0000-0001-9812-5183

61 Niamh Roche (NR): [Niamh.roche@demersal.net](mailto:Niamh.roche@demersal.net)

62 Ruth Stokes (RS): [ruthdotstokes2@gmail.com](mailto:ruthdotstokes2@gmail.com)

63 Mary Kelly (MK): [mek197.mk@gmail.com](mailto:mek197.mk@gmail.com)

64 Angela M. Cheung (AMC): [Angela.Cheung@uhn.ca](mailto:Angela.Cheung@uhn.ca); 0000-0001-8332-0744

65 Kristine M. Erlandson (KME): [KRISTINE.ERLANDSON@CUANSCHUTZ.EDU](mailto:KRISTINE.ERLANDSON@CUANSCHUTZ.EDU); 0000-0003-0808-6729

66 Richard Harding (RH): [richard.harding@kcl.ac.uk](mailto:richard.harding@kcl.ac.uk); 0000-0001-9653-8689

67 Jaime H. Vera (JHV): [j.vera@nhs.net](mailto:j.vera@nhs.net); 0000-0002-1165-0573

68 Colm Bergin (CB): [CBergin@STJAMES.IE](mailto:CBergin@STJAMES.IE); 0000-0002-6651-1132

69 Larry Robinson (LR): [Larry.Robinson@sunnybrook.ca](mailto:Larry.Robinson@sunnybrook.ca)

70 Lisa Avery (LA): [lisa.avery@uhn.ca](mailto:lisa.avery@uhn.ca); 0000-0002-8431-5143

71 Ciaran Bannan (CBan): [CBannan@STJAMES.IE](mailto:CBannan@STJAMES.IE); 0000-0002-9288-8574

72 Brittany Torres (BT): [brittany.torres@utoronto.ca](mailto:brittany.torres@utoronto.ca)

73 Imelda O'Donovan (IOD): [imeldaodonovan@gmail.com](mailto:imeldaodonovan@gmail.com)

74 Nisa Malli (NM): [malli.nisa@gmail.com](mailto:malli.nisa@gmail.com)

75 Patricia Solomon (PS), PhD, PT: [solomon@mcmaster.ca](mailto:solomon@mcmaster.ca); 0000-0002-5014-0795

76

77

## 78 **Abstract**

79

80 **Background:** Increasing numbers of adults are living with the health-related consequences of  
81 Long COVID. The Episodic Disability Framework (EDF), derived from perspectives of adults  
82 living with HIV, characterizes the multidimensional and episodic nature of health-related  
83 challenges (disability) experienced by an individual. Our aim was to determine the applicability  
84 of the Episodic Disability Framework to conceptualize the health-related challenges  
85 experienced among adults living with Long COVID.

86 **Methods:** We conducted a community-engaged qualitative descriptive study involving online  
87 semi-structured interviews. We recruited adults who self-identified as living with Long COVID  
88 via collaborator community organizations in Canada, Ireland, United Kingdom, and United  
89 States. We purposively recruited for diversity in age, gender identity, ethnicity, sexual  
90 orientation, and time since initial COVID-19 infection. We used a semi-structured interview  
91 guide informed by the EDF to explore experiences of disability living with Long COVID,  
92 specifically health-related challenges and how challenges were experienced over time. We  
93 conducted a group-based content analysis.

94 **Results:** Of the 40 participants, the median age was 39 years; and the majority were white  
95 (73%), women (63%), living with Long COVID for  $\geq 1$  year (83%). Consistent with the Episodic  
96 Disability Framework, disability was described as multidimensional and episodic, characterized  
97 by unpredictable periods of health and illness. Experiences of disability were consistent with  
98 the three main components of the Framework: A) dimensions of disability (physical, cognitive,  
99 mental-emotional health challenges, difficulties with day-to-day activities, challenges to social  
100 inclusion, uncertainty); B) contextual factors, extrinsic (social support; accessibility of

101 environment and health services; stigma and epistemic injustice) and intrinsic (living strategies;  
102 personal attributes) that exacerbate or alleviate dimensions of disability; and C) triggers that  
103 initiate episodes of disability.

104 **Conclusions:** The Episodic Disability Framework provides a way to conceptualize disability the  
105 multidimensional and episodic nature of disability experienced by adults living with Long  
106 COVID. The Framework provides guidance for future measurement of disability, and health and  
107 rehabilitation approaches to enhance practice, research, and policy in Long COVID.

## 108 Introduction

109 More individuals are living with persistent and prolonged signs and symptoms following  
110 infection consistent with COVID-19, referred to as Long COVID, or Post COVID-19 Condition  
111 (PCC) [1-5]. Long COVID is defined by the World Health Organization occurring usually 3 months  
112 from the onset of probable or confirmed COVID-19 with symptoms that last for at least 2  
113 months and cannot be explained by an alternative diagnosis[3]. An estimated 144 million  
114 individuals are living with Long COVID although estimates vary considerably across studies [5-  
115 11]. The impact of Long COVID has forecast immense economic costs in quality of life, reduced  
116 earnings and medical expenditures [12].

117 Long COVID is characterized by a multitude of health symptoms that affect daily  
118 functioning and social participation [13-15]. In Canada, of the estimated 3.5 million individuals  
119 (11.7% of the population) living with Long COVID, 79% were living with symptoms for six  
120 months or longer, with 42% experiencing symptoms for a year or more, the majority of which  
121 experienced symptoms daily [7]. Among the estimated 2 million people living with Long COVID  
122 in the United Kingdom (UK) (3.3% of the population), 79% reported their symptoms negatively  
123 impacted their daily activities [8]. Fatigue was the most common reported symptom (72%),  
124 followed by difficulty concentrating (51%), muscle aches (49%), and shortness of breath (48%).  
125 In a community-led online survey across 56 countries, participants experienced an average of  
126 56 symptoms spanning nine organ systems including fatigue, post exertional symptom  
127 exacerbation (PESE) or post exertional malaise (PEM), and cognitive dysfunction, with 86% of  
128 respondents experiencing relapses in symptoms triggered by physical or mental activity, or  
129 stress[16]. Health challenges in Long COVID, such as PESE overlap with other conditions such as

130 Myalgic Encephalomyelitis / Chronic Fatigue Syndrome (ME/CFS) characterized by persistent  
131 and sometimes fluctuating health challenges that can be triggered by physical, cognitive, social  
132 or emotional exertions [17-19]. Evidence from similar and overlapping illnesses like ME/CFS  
133 indicate persistent and potentially life-long disability [20, 21]. Collectively, health challenges  
134 experienced by adults living with Long COVID are referred to as 'disability' [22, 23].

135         The Episodic Disability Framework (EDF) [24], originally developed from the perspectives  
136 of adults living with HIV, broadly defines disability as multi-dimensional, comprised of any  
137 physical, cognitive, mental and emotional symptoms and impairments, activity limitations,  
138 challenges to social participation, or uncertainty that may be experienced by an individual, that  
139 may fluctuate within or on a daily basis, or over the longer term [24]. The Framework is  
140 comprised of three main components: 1) dimensions of disability; 2) contextual (intrinsic and  
141 extrinsic) factors that interact with and influence disability and, and 3) triggers that can  
142 exacerbate or alleviate disability [24, 25]. The EDF offers a foundation from which to consider  
143 disability experienced in other chronic conditions, such as Long COVID [26].

144         Episodic disability is a term used by adults living with Long COVID to describe the  
145 trajectories of their health-related challenges, referencing relapsing or remitting fluctuations in  
146 symptoms and severity over time [23]. Our earlier work highlighted the episodic nature of while  
147 living with Long COVID [27]. A conceptual foundation of disability in Long COVID is essential for  
148 better understanding the construct of health-related challenges of people living with Long  
149 COVID. This is critical for subsequently guiding measurement of the construct, and to inform  
150 health and rehabilitation approaches to enhance clinical practice, policy, and research. Our aim

151 was to determine the applicability of the Episodic Disability Framework to conceptualize the  
152 health-related challenges experienced by adults living with Long COVID.

## 153 **Materials and Methods**

### 154 **Study Design**

155 We conducted a qualitative descriptive study involving online semi-structured  
156 interviews with adults living with Long COVID in Canada, Ireland, the United Kingdom (UK) and  
157 the United States (US). This study was approved by the University of Toronto Health Sciences  
158 Research Ethics Board (Protocol #41749). More details on the study protocol are published  
159 elsewhere [28].

### 160 **Patient and Public Involvement**

161 Our team involves a community-clinical-academic collaboration among the Long COVID  
162 community, clinicians, and researchers in the field of Long COVID, rehabilitation and episodic  
163 disability [29]. Persons with experiences living with Long COVID, representing Long COVID  
164 community networks and organizations including: Long COVID Physio (DAB, CT) [30], Patient-  
165 Led Research Collaborative (HW, LMCC) [31], COVID Long-Haulers Support Group Canada (SG)  
166 [32], Long Covid Support (MOH) [33], Long COVID Ireland (NR, RS) [34], and Long COVID  
167 Advocacy Ireland (NR, RS, IOD) [35] referred to as the Core Long COVID Community  
168 Collaborator Team were involved in the research design, sampling strategy, recruitment,  
169 analysis, interpretation of study findings, drafting, and reviewing the manuscript. The Core Long  
170 COVID Community Collaborator Team met monthly to discuss sampling strategy, recruitment  
171 process, and characteristics to inform purposive recruitment.

## 172 **Participants**

173 We included adults who self-identified as living with Long COVID, defined as signs and  
174 symptoms that develop during or following an infection consistent with COVID-19 which  
175 continue for 12 weeks or more and are not explained by an alternative diagnosis [3]. We  
176 recruited participants from December 7, 2021 to May 9, 2022. We used targeted recruitment  
177 via community organizations and networks noted above to recruit 10 participants per country.  
178 We used purposive sampling with an aim to recruit a sample with diversity in age, gender  
179 identity, race, sexual orientation, and duration since initial presentation of COVID-19.

## 180 **Data Collection**

181 We conducted online (Zoom-based) interviews in Canada, United States (KKO, BT,  
182 KMcD), Ireland and United Kingdom (NSS)[36]. Using a semi-structured interview guide, the  
183 principal investigator (KKO) and research coordinators (BT, KMcD, NSS), all of who were female  
184 and physiotherapists, asked participants about experiences living with Long COVID, and the way  
185 in which they experienced their health-related challenges (**S1** – Interview Guide). Following the  
186 interview, we administered a demographic questionnaire via Qualtrics[37], an online  
187 questionnaire platform to describe personal, health and COVID-related characteristics of the  
188 sample. All interviews were audio recorded and transcribed verbatim.

## 189 **Consent**

190 All participants provided informed written verbal consent. Participants were offered a  
191 \$30 CAD, \$20 USD, €20 or £15 electronic gift card for participation in the study. The interviewer



192 followed up with each participant the day following the interview to check in on the process  
193 and to provide suggestions for support services if needed.

## 194 **Analysis**

195 We conducted a group-based qualitative analysis using content analytical techniques  
196 [38]. All transcripts were coded line-by-line using a coding framework informed by the Episodic  
197 Disability Framework established in the context of HIV [24, 25], while allowing for additional  
198 codes to emerge from the data. A sub-set of 10 transcripts were independently coded by a  
199 second reviewer (KMCD). Five team members (KKO, DAB, SCC, NSSC, PS) reviewed a sub-set of  
200 four transcripts and provided higher level categories, impressions and reflections from which to  
201 contextualize the data. The community members of the team met on three occasions to review  
202 the coding summary and graphical illustrations, review and discuss participant summaries,  
203 discuss preliminary findings related to the conceptualization of disability, and provide  
204 reflections of validation and interpretations of the findings. We used NVivo software to  
205 facilitate data management [39].

## 206 **Results**

### 207 **Characteristics of Participants**

208 Forty adults living with Long COVID (10 per country) participated in an interview  
209 between December 2021 and May 2022. Interviews were approximately one hour in duration;  
210 and five participants split the interview into two separate sessions. The median age of  
211 participants was 39 years (25<sup>th</sup>, 75<sup>th</sup> percentile: 32, 49). The majority of participants were  
212 women (63%), white (73%), living with Long COVID for more than 1 year (83%), experienced at

213 least one relapse in their symptoms (93%), and unable to work or on leave of absence due to  
214 Long COVID (50%). Details on the characteristics of participants have been published elsewhere  
215 [27].

## 216 **Conceptual Framework of Episodic Disability**

217 Disability experienced by adults living with Long COVID was characterized by  
218 multidimensional and episodic health-related challenges conceptualized by the Episodic  
219 Disability Framework. Participants described disability as a range of health-related challenges,  
220 resulting in short- and long-term fluctuations in health. Episodic disability was conceptualized  
221 as a continuum of health challenges with variable presence, severity and duration of health  
222 challenges over time. Disability included day-to-day health fluctuations (or fluctuations within a  
223 day), that may be super-imposed over the broader spectrum of disability experienced over  
224 months or years living with Long COVID. Participants described visible and invisible aspects of  
225 disability, some of which may be episodic while co-existing with permanent or constant aspects  
226 of disability. Details on the episodic nature of disability, have been published elsewhere [27]. In  
227 this paper, we focus on experiences of disability as conceptualized by the Episodic Disability  
228 Framework.

229 Disability experiences aligned with the three main components of the Episodic Disability  
230 Framework: 1) dimensions of disability; 2) contextual (intrinsic and extrinsic) factors that  
231 interact with and influence disability and, and 3) triggers that can initiate episodes of disability.  
232 **Fig 1** is an exemplar of the components of the Episodic Disability Framework in the context of  
233 Long COVID, involving the six dimensions of disability (Component A), each with distinct  
234 trajectories which may influence each other and accumulate over time, superimposed with the

235 daily (or within the day) fluctuations. Dimensions of disability may be exacerbated or alleviated  
236 by contextual factors (Component B), and triggered over time (Component C).

237

238 **Fig 1. Episodic Disability Framework: An Exemplar in the Context of Long COVID.** *Component 1*

239 - Dimensions of Disability: each line represents a different dimension of the Episodic Disability  
240 Framework: green: physical symptoms; pink: cognitive symptoms; purple: mental and  
241 emotional symptoms; dark blue: difficulties with day-to-day activities; red: challenges to social  
242 inclusion; brown: uncertainty. Superimposed along the six dimensions of disability trajectories  
243 are the daily fluctuations in health. The illustration indicates episodic disability does not refer to  
244 absolute presence or absence of disability, but rather that there may be fluctuations in the  
245 certain dimensions of disability over time while other dimensions may be more persistent, such  
246 as, in this example, uncertainty. *Component 2 - Contextual Factors:* Intrinsic (circles) and  
247 extrinsic (squares) factors may alleviate or exacerbate disability. For example, living strategies  
248 or supports (indicated by the green circles) may help reduce disability that an individual  
249 experiences; and stigma and gas lighting (indicated by the red square) may exacerbate mental  
250 and emotional health challenges and disability. *Component 3 – Triggers* are indicated on the x-  
251 axis which represent potential events that can initiate an episode of disability.

252

### 253 **Framework Component A - Dimensions of Disability**

254 Participants described episodic disability, as any health-related challenges spanning the  
255 six dimensions of the EDF: i) physical, ii) cognitive, and iii) mental-emotional health-challenges,  
256 iv) difficulties with day-to-day activities, v) challenges to social inclusion, and vi) uncertainty

257 about the future experienced by an individual, that may fluctuate on or within a daily basis, and  
258 over the longer course of living with Long COVID (**Fig 1**). The six disability dimensions appeared  
259 inter-related; meaning the experience in one dimension can be associated with experiences of  
260 another.

261 Symptoms and impairments were experienced at the level of a body part, structure or  
262 function and spanned physical, cognitive, mental and emotional health domains. PESE was a  
263 common symptom that transcended all of these domains, characterized by disproportionate  
264 and sometimes delayed onset of health challenges following physical, cognitive, or emotional  
265 exertion [40]. Symptoms and impairments were primarily related to Long COVID, but also  
266 included manifestations from pre-existing illnesses or conditions.

### 267 **Physical Symptoms and Impairments**

268 Participants reported a breadth of physical symptoms and impairments (**Fig 2**). Fatigue,  
269 pain (neuropathic, chest, joint and muscle, headaches, nerve pain), shortness of breath, and  
270 dizziness (potentially attributed to orthostatic intolerance) were prevalent symptoms. Most  
271 participants experienced multiple physical symptoms at a given time.

272

### 273 **Fig 2. Physical Symptoms - Dimension of Disability in the Episodic Disability Framework.**

274 Physical health challenges living with Long COVID over time. Superimposed on the major  
275 fluctuations in health and disability are the daily fluctuations (or fluctuations in the course of  
276 the day) in health and disability.

277

278 Prominent physical health challenges included fatigue, reduced energy, and PESE.  
279 Participants described having “a lot of fatigue every single day (P26, US)“which was “limiting”  
280 (P30, UK). Fatigue was described as episodic in nature - the “level of intensity varies” (P26, US)  
281 and “it’s different to being ... tired. It’s just a different level...That kind of comes in peaks and  
282 drops. It’s not consistent everyday but it’s always there and the severity kind of it just depends”  
283 (P32, UK). Participants described that they sometimes experienced a sudden and unpredictable  
284 onset of extreme fatigue, commonly described as a ‘crash’:

285 *“Sometimes you don’t always know when it’s going to hit and it just hits you like you’ve*  
286 *just crashed into a brick wall and suddenly you can’t do anything else and you know you*  
287 *need to go rest.” P30, UK*

288 Fatigue initiated a ‘cascade of disability’ that may result in further physical and cognitive  
289 impairments, plus limitations in functioning as this participant stated:

290 *“The main one that hits me is the fatigue just doing minimal things and feeling like I’ve*  
291 *been wiped out completely by it all. But then with the fatigue comes everything else, all*  
292 *of the other symptoms as well.” P5, UK*

293 See **Table 1** for a list of the physical symptoms and impairments described by participants.

294 **Table 1:** Physical Symptoms and Impairments Living with Long COVID articulated by participants  
295 across the interviews (in alphabetical order) (n=40)

| Physical Symptoms and Impairments                                                                                      |
|------------------------------------------------------------------------------------------------------------------------|
| Cardiac issues (tachycardia; bradycardia; pericarditis; myocarditis; arrhythmic intolerance; palpitations; chest pain) |
| Circulation issues (e.g. Raynaud’s)                                                                                    |
| Cramping (different body parts)                                                                                        |
| Decreased appetite                                                                                                     |
| Decreased bone density                                                                                                 |
| Difficulty swallowing                                                                                                  |

|                                                                                                                        |
|------------------------------------------------------------------------------------------------------------------------|
| Dizziness (attributed to Orthostatic intolerance (Dysautonomia; Postural Orthostatic Tachycardia [POTS]))              |
| Excessive thirst                                                                                                       |
| Fatigue                                                                                                                |
| Fevers                                                                                                                 |
| Gastrointestinal (GI) issues (slow digestion; diarrhea; persistent hiccups; GERD; food intolerances)                   |
| Hair loss                                                                                                              |
| Hearing impairment (tinnitus; noise sensitivity)                                                                       |
| Hemi-paresis (described as intermittent; sometimes affecting one limb or face).                                        |
| Light sensitivity                                                                                                      |
| Lymphedema                                                                                                             |
| Menstruation changes                                                                                                   |
| Nausea                                                                                                                 |
| Orthostatic intolerance (Dysautonomia; Postural Orthostatic Tachycardia [POTS])                                        |
| Pain (neuropathic; chest; joint and muscle; headaches / migraines; sciatica; nerve pain)                               |
| Persistent cough                                                                                                       |
| Persistent sore throat                                                                                                 |
| Post-exertional symptom exacerbation or post-exertional malaise                                                        |
| Rashes                                                                                                                 |
| Restless leg syndrome                                                                                                  |
| Sensory impairments or altered (temperature sensitivity; pain; internal vibrations; touch – pins and needles)          |
| Shortness of breath                                                                                                    |
| Skin sensitivity                                                                                                       |
| Sleep issues (insomnia; excessive sleep; pain disruption)                                                              |
| Speech impairment                                                                                                      |
| Swallowing impairment                                                                                                  |
| Taste and smell impairment / altered taste and smell (absent; phantom smells (e.g. burning, other smells))             |
| Temperature dysregulation (e.g. excessive sweating; hot/cold flashes; hands turning blue; persistent low grade fevers) |
| Tremors                                                                                                                |
| Unexplained bruising                                                                                                   |
| Urinary urgency and frequency                                                                                          |
| Voice impairments (hoarse voice)                                                                                       |
| Vision impairments (blurred vision; sore eyes)                                                                         |
| Weakness (muscle)                                                                                                      |
| Weight loss or gain                                                                                                    |

296

297

298 **Cognitive Symptoms and Impairments**

299 Participants described either an inability to complete certain cognitive tasks, or that the  
300 process of completing cognitive tasks had become complex, laborious, energy-intensive, and  
301 draining; they noted limitations in **cognitive endurance** or stamina (**Fig 3**).

302

303 **Fig 3. Cognitive Symptoms - Dimension of Disability in the Episodic Disability Framework.**

304 Cognitive health challenges living with Long COVID over time. Superimposed on the major  
305 fluctuations in health and disability are the daily fluctuations (or fluctuations in the course of  
306 the day) in health and disability.

307

308 Participants described difficulties performing tasks such as having a conversation, or  
309 remembering routine safety considerations, such as turning on and off the stove. Some  
310 participants referred to their cognitive impairments as '*brain fog*' whereas others took issue  
311 with this term not sounding legitimate, and were concerned that '*brain fog*' may be easily  
312 dismissed or minimized by others. Hence, we refer to these health challenges as cognitive  
313 symptoms and impairments:

314 *"I don't like the word brain fog because brain fog does not describe it...It's like being*  
315 *completely lost... slightly removed from who you are. You can see everything you need*  
316 *but it's out of reach. You can't get to it... I suppose it is like being lost at sea in a fog*  
317 *literally. But it's profoundly distressing and profoundly confusing and it is like having*  
318 *dementia."* P12, Ireland.

319 Participants described challenges with **executive function, word finding, and communication**  
320 **(written and oral)**. Specifically, they described difficulties with **concentration, memory** (short-

321 term; long-term; working memory), as well as **information processing** (including **speed of**  
322 **processing information**). One participant stated:

323 *“The cognitive decline ... it’s not consistent. It’s kind of random word loss. My short-term*  
324 *memory is very poor... using words in the wrong context, repeating myself, not being*  
325 *able to concentrate. If there’s more than one person speaking in a room I can’t follow*  
326 *the conversation. So when I’m trying to process the information that’s being said, even if*  
327 *it’s just an ordinary conversation, by the time I figure out what we’re talking about,*  
328 *they’ve moved on to something else. So I’m way behind... Something I would have done*  
329 *at work without thinking about it, now it could take the whole day of energy to build up*  
330 *to be able to do it. It’s not the physical thing. It’s an exhaustion from... the cognitive side*  
331 *of it.” P36, Ireland.*

332 Complex tasks including **multi-tasking**, were particularly challenging for participants. Cognitive  
333 impairments could be triggered by exertion (e.g. PESE), events or stimuli (e.g. stress, fatigue),  
334 similar to physical impairments: *“it doesn’t take a whole lot to flare up some of the cognitive*  
335 *symptoms” (P2, US).*

336 See **S2 Table** for supportive quotes for health challenges that comprise the cognitive dimension.

### 337 **Mental-Emotional Symptoms and Impairments**

338 Mental-emotional challenges were sometimes experienced as episodic. The severity of  
339 challenges often was dependent on circumstances or other symptoms (**Fig 4**).

340

### 341 **Fig 4. Mental-Emotional Symptoms - Dimension of Disability in the Episodic Disability**

342 **Framework.** Mental and emotional health challenges living with Long COVID over time.



343 Superimposed on the major fluctuations are the daily fluctuations (or fluctuations during the  
344 course of the day) in health and disability.

345  
346 Participants described feeling **grief, devastation and loss** of their pre-COVID functioning,  
347 health, relationships, employment, career and finances. For some participants, their career was  
348 on hold and they were uncertain if and when they would be able to return.

349 *“Realizing that I couldn’t work ...towards the end of when I was in my job and ... just*  
350 *realizing I really couldn’t do it anymore. That was really devastating because I liked my*  
351 *job and I worked really hard to get that job and I had a lot of, still have a lot of student*  
352 *loans... just like the financial implications of that. My partner and I really prioritized my*  
353 *career as like the income we were mostly relying on. So that was just practically speaking*  
354 *very stressful but then also ... it was emotionally sad...I put a lot into my career.” P26, US*

355 Participants described feelings of **anxiety and depression**, as a health-related consequence of  
356 living with Long COVID. For those who experienced mental health challenges prior to acquiring  
357 Long COVID, they discussed how their health challenges were exacerbated or became more  
358 difficult to manage because they were no longer able to engage in prior strategies (e.g. exercise,  
359 spending time with friends or family). However, some participants expressed feeling hesitant to  
360 identify with any label of mental illness as it might be used to undermine their experiences.

361 *“I’ve had to do those general anxiety disorder and depression scales. I really resent doing*  
362 *them because I don’t think I’m either anxious or depressed...if I’m a bit down it’s because*  
363 *I can’t do anything and my life has disappeared. I don’t actually think I’m anxious*  
364 *considering what’s happened to me and the implications of that. I think I’m doing rather*

365 *well... Although on my records it would say that I have anxiety and depression, I really*  
366 *rally against that because actually I think psychologically I'm doing really well*  
367 *considering the challenges I face." P19, UK*

368 Participants described feeling **stress**, specifically related to their finances, ability to engage in  
369 employment, and dealing with health providers and the insurance system. Some described  
370 feeling **fear**, specifically of relapse or deterioration in health, crowds, reinfection, and  
371 uncertainty as this participant stated: *"you get a fear in your gut that it's just the way it's going*  
372 *to be the whole time" (P10, Ireland).*

373 Participants also described the emotional toll living with ongoing challenges of day-to-  
374 day disability, which manifested as feeling **anger and irritable (sometimes manifesting in mood**  
375 **swings)**, stating: *"You have no control over your emotions."* (P13, Canada). Some participants  
376 referred to experiencing trauma from *"not being believed when you felt like you were going to*  
377 *die"* (P1, UK), and in some cases described feelings **hopeless and experiencing suicide ideation**.  
378 Some described feeling **guilt** that they were unable to fulfill their prior roles as parents, or  
379 employees. Many participants also spoke about feeling **lonely** due to isolation during the  
380 pandemic and as a person living with disability. As this participant stated:

381 *"...being alone...has been not the best for my mental health ... and not the best for my*  
382 *physical health because there are times when I shouldn't be doing things and I have to*  
383 *do them because there aren't other people to help... being isolated... being left alone*  
384 *with your own thoughts for that long is not good... It's not good for your mental health*  
385 *...emotionally it's anxiety-making, it's depressing."* P22, Canada

386 See **S2 Table** for supportive quotes for health challenges that comprise the mental-emotional  
387 dimension.

### 388 **Difficulties with Day-to-Day Activities**

389 Participants spoke about challenges of engaging in basic activities of daily living (BADLS),  
390 and having to stick with *'the bare minimum'* to stay within their energy capacity or avoid  
391 triggering symptoms. Participants were limited in their day-to-day activities because of reduced  
392 physical or cognitive capacity. Specific challenges included **mobility** (ambulation, stairs, driving),  
393 **sitting upright (as a result of orthostatic intolerance), reading, bathing and showering,**  
394 **dressing and brushing teeth (Fig 5).**

395 *"I was lying down all the time at home and was barely able to get what I needed to eat...*  
396 *I was showering the bare minimum... I still only have a bath once a week... it's bare*  
397 *minimum management of your daily needs."* P12, Ireland

398  
399 **Fig 5. Difficulties with Day-to-Day Activities - Dimension of Disability in the Episodic Disability**

400 **Framework.** Difficulties carrying out day-to-day activities living with Long COVID over time.  
401 Superimposed on the major fluctuations are the daily fluctuations (or fluctuations during the  
402 course of the day) in health and disability.

403  
404 Participants also articulated challenges with **preparing meals, cleaning, shopping and getting**  
405 **to appointments.** Participants referred to relying on assistance with basic and instrumental  
406 activities of daily living (IADLs).

407 *"I couldn't cook myself meals. I couldn't clean the house. I was bed-bound and couldn't*  
408 *actually do anything. Because sometimes I was either having trouble walking or when I*  
409 *would stand up my heart would you know just be like jumping you know through the*  
410 *roof. So it's changed my life dramatically."* P18, Canada

411 See **S2 Table** for supportive quotes in the day-to-day activities dimension.

## 412 **Challenges to Social Inclusion**

413 Participants experienced challenges with social inclusion, such as engaging with others  
414 and fulfilling social roles within family and work life, sometimes due to physical or cognitive  
415 symptoms (**Fig 6**).

416

### 417 **Fig 6. Challenges to Social Inclusion - Dimension of Disability in the Episodic Disability**

418 **Framework.** Challenges to social inclusion living with Long COVID over time.

419

420 Participants faced limitations with respect to social engagement, such as **recreation**, and other  
421 **leisure** activities (attending restaurants, movies, travel), difficulty engaging in **leisure activities**  
422 (dance, playing sport, running, climbing), and leaving the house to engage with others. Engaging  
423 in **social interactions and activities** required more planning and preparation, and more energy  
424 than before, as this participant stated:

425 *"It's like these things that I used to just take for granted like going for walks, going*  
426 *skiing, you know sitting at a desk. You know those aren't... so sitting in a restaurant is*  
427 *not an option. If I go to a restaurant I have to find a place where I can... a booth where I*  
428 *can sit sideways and lean so I'm mostly reclined. So all those social things just are out. If*

429 *we have friends over, I can engage for half an hour, 45 minutes or maybe a little longer.*

430 *But I've come to a point where I just say no, I've got to go upstairs, I've got to go lie*

431 *down. So all of those things basically are just dramatically different."* P15, US

432 Participants experienced strain on **personal relationships**, resulting in lost **friendships,**  
433 **relationships, and social networks.** Participants spoke about challenges finding time for social  
434 interaction with family, friends, or partners because of their limited energy and need to  
435 prioritize BADLs. Others referred to negative impacts of Long COVID on relationships due to  
436 friends, family, or partners who did not understand their health challenges with Long COVID.  
437 Participants talked about strain on their personal relationships when they had to cancel plans  
438 because of an unexpected crash. The profound challenges to social interaction were closely  
439 linked to emotional challenges, such as loneliness or social isolation, as articulated by this  
440 participant:

441 *"I'm just glad I even can talk to you and you're my human contact for today. I don't have*

442 *no other contacts for the rest of the day. That's why I just keep talking to you. It's like*

443 *there's nobody else."* P39, Canada

444 Participants described **difficulties fulfilling social or caregiving roles** as a partner, parent, or  
445 caregiver for children, aging parents or siblings: *"It takes all of my energy to fulfil my parental*  
446 *obligations when they're around [children] and then it takes the entire week when they're gone*  
447 *for me to recover and have to be in the place to repeat that cycle all over again."* (P25, Canada).

448 Participants described **difficulty or inability to engage in work, employment and school**  
449 due to limited physical and cognitive capacity. If participants were unable to access social

450 supports to balance work with rest, they were faced with the decision of “*you can either work*  
451 *or you can get better*” (P40, US).

452 Some described returning to work with modifications, flexing or changing hours, or  
453 working from home. Participants articulated how the episodic and sometimes unpredictable  
454 nature of their symptoms made it difficult to establish a feasible return to work plan, even  
455 though at times they would be able to do at least some of their work.

456 *“I can only do maybe a max of 10 hours a week if that. But through all that I’m still*  
457 *trying... it’s taken a long time to find things but I’m still trying to find even that so that I*  
458 *can earn that little bit of extra income because I know even for me and part of it...feeling*  
459 *useful in society...I like to feel at least useful and helpful to people. So I haven’t given up*  
460 *in trying to find at least a little bit of something but it’s still I could never support*  
461 *myself.” P38, Canada*

462 Participants faced **financial instability and insecurity** as they had to stop or reduce their work.  
463 A number of participants living off savings expressed worry about **housing security**, their ability  
464 to pay off **student loans**, and what would happen when their **savings run out**, as this  
465 participant stated: “*I just keep trying to think of new ways to survive*” (P23, US). Another  
466 participant described their challenges with navigating income supports:

467 *“ODSP [Ontario Disability Support Program] is six months to a year to get approved for...*  
468 *I still had this ridiculous notion that I was going to get better. ... even if suddenly and*  
469 *miraculously I were approved for ODSP tomorrow, which is not going to happen, I don’t*  
470 *know how anybody lives on it...There’s actually nowhere to live anywhere in Canada with*  
471 *that kind of money. And then they’re like ‘you can get a part time job’...I can probably*

472 *work an hour and a half every three days if I really tried hard and that job doesn't exist....*

473 *What I have is a terrible fear of like homelessness." P22, Canada*

474 Financial insecurity associated with Long COVID resulted in a **disruption to, and loss of**

475 **retirement plans and goals**, as described by this participant:

476 *"It's certainly not what I anticipated my retirement being. I had just completed... my*

477 *retirement was going to include that mix of consulting. I had completed a yoga teacher*

478 *training program. I was looking at different ski instructor programs, actually more*

479 *assisted skiing, helping the disabled ski, being the guide for disabled skiers... Those are*

480 *gone you know, boom." P15, US*

481 See **S2 Table** for supportive quotes in the challenges to social inclusion dimension.

## 482 **Uncertainty about the Future**

483 Participants described **uncertainty and worry about the future** living with Long COVID,

484 characterized by unpredictability of fluctuating health challenges, evolving knowledge of the

485 causes of and treatments for Long COVID, and its impact on their overall health and future life

486 decisions (**Fig 7**).

487

488 **Fig 7. Uncertainty - Dimension of Disability in the Episodic Disability Framework.** Uncertainty

489 and worrying about the future living with Long COVID over time. Episodic disability does not

490 refer to absolute presence or absence of disability; there may be fluctuations in certain

491 dimensions of disability over time, while other dimensions remain persistent, such as, in this

492 example, uncertainty.

493

494 Participants described Long COVID, as “a moving target” (P24, US), not knowing what to  
495 expect, as they experienced new and relapsing health challenges over time. They described the  
496 uncertainty of their condition over the short or the long term, as this participant stated: “The  
497 biggest challenge is not knowing when they’re [episodes] going to happen, how long they’re  
498 going to last or how much I can get away with before causing it.” (P2, US) This participant  
499 described the uncertainty of their episodic health:

500 *“Fluctuations, it’s unpredictable really... last year I was going through a period where I*  
501 *thought I was improving and I thought I was on like an upward trajectory and I was I*  
502 *suppose until a certain point. So I got to a stage where I was able to go walking, go on*  
503 *walks for like up to an hour without crashing.... And then it got to a point where the*  
504 *walk, going for a walk, was making me crash the next day... I’ve kind of just been down. I*  
505 *don’t know if ... I’m stable or going in towards a downwards trajectory. It’s hard to tell*  
506 *really... I really don’t know what caused that shift from like improving to losing that.”*

507 *P37, Ireland*

508 Uncertainty was experienced within the course of the day: “you never really know when it’s  
509 going to be a good day and when it’s going to be a bad day” (P37, Ireland) as well as with  
510 respect to **future health, ability to work, financial and housing security**. Participants also  
511 worried about their **ability to have a family**, and fulfill **family and social roles, and activities**.

512 *“When I think about you know the future, especially my partner and I were thinking of*  
513 *having a baby, how you know would my body even be able to handle a pregnancy. I*  
514 *mean I can’t handle a cold.” P21, UK*



515 Uncertainty had implications on challenges to social inclusion, specifically employment,  
516 financial and housing security, and **broader implications on future health and life decisions**,  
517 such as **family planning or returning to work** as this participant stated: *“How will you know*  
518 *you’re ready to return to work?” (P25, Canada)*

519 This participant described the relationships between uncertainty and social inclusion,  
520 their ability to engage in daily activities of function, and social activities such as travel or leisure  
521 was impaired due to the unpredictability of their episodes:

522 *“I couldn’t really commit to even social plans. .... there were some days where I would*  
523 *have to cancel last minute because it just wasn’t a good day .... there’s just not a lot of*  
524 *predictability despite me trying to track everything and log all of the triggers and*  
525 *symptoms and durations, it’s still hard to predict.” P2, US*

526 Furthermore, participants expressed **uncertainty of the underlying causes of Long COVID:**

527 *“If you can understand at least the basics of why (Long COVID happens)... the underlying*  
528 *mechanism of whatever is happening with you, then you can accept it and deal with it*  
529 *and then try and build your life to kind of pace yourself around it. But when you have no*  
530 *idea... you can’t.” P1-UK*

531 Uncertainty was closely linked to mental and emotional dimensions of disability. Participants  
532 described feeling fearful about what the nature and severity of their next an episode might be,  
533 the potential for onset of new symptoms, the long-term health consequences of Long COVID,  
534 and whether recovery was possible:

535 *“[having] zero explanation for what was happening. I also experienced a lot of fear and*  
536 *uncertainty around how long is this going to last...it’s a very frightening prospect to think*  
537 *of that number never getting better.” P17, US*

538 Uncertainty was acknowledged by participants as a concept concurrently **experienced by**  
539 **health care providers, insurers and employers** as they also grappled with the unknown of the  
540 underlying cause, treatment, and trajectories of Long COVID.

541 See **S2 Table** for supportive quotes related to uncertainty.

542 Collectively, the dimensions of disability describe and define disability, whereas the  
543 following two components of the framework describe how disability was experienced by adults  
544 living with Long COVID.

545

## 546 **Framework Component B - Contextual Factors**

547 Throughout the interviews, participants described extrinsic and intrinsic contextual  
548 factors that exacerbated or alleviated dimensions of disability. Contextual factors describe the  
549 context in which disability is experienced; they could be static (either present or absent) (e.g.  
550 social policy), progressive (e.g. ageing) or fluctuate over time (e.g. levels of support) (**Fig 8**).

551

552 **Fig 8. Contextual Factors of Disability in the Episodic Disability Framework.** Intrinsic  
553 contextual factors (circles) may alleviate (green) or exacerbate (red) dimensions of disability.  
554 Extrinsic contextual factors (squares) may alleviate (green) or exacerbate (red) dimensions of  
555 disability.

556

557 **A) Extrinsic Contextual Factors**

558 Extrinsic contextual factors included modifiable factors in the form of **practical, emotional, and**  
559 **social support, physical accessibility of the environment and health services**, which were able  
560 to alleviate disability whereas **lack of support, stigma and epistemic injustice** exacerbated  
561 dimensions of disability.

562 **A.1. Support**

563 **Support** included the presence or absence of practical, emotional and social support from i)  
564 friends, family, partners; ii) the Long COVID community, iii) health and rehabilitation services  
565 and providers, iv) employers, insurers, human resource professionals, and workplace colleagues  
566 in the form of accommodation, v) program, policy and income support, and vi) mobility aids  
567 and technology.

568 Practical, emotional and social support from friends, family, partners: Participants described  
569 practical support from partners in terms of financial support, and support with household  
570 chores, cleaning, cooking, and groceries. Some participants described moving in with family to  
571 receive assistance with daily activities, whereas some who lived alone described challenges to  
572 find assistance with BADLs or IADLs.

573 Participants spoke about how support received from **family, friends, partners**, influenced their  
574 social relationships, as this participant stated:

575 *“I’m really lucky. My partner has been brilliant. He works from home. His income is such*  
576 *that we can take mine not working. .... I feel we are really privileged from that point of*  
577 *view. All this to say, it’s made our relationship stronger. I’ve had to be much more open.*  
578 *I’ve always been quite sort of strong and controlled and managing things and I’ve had to*

579 *ask for more help in this last year from anybody than I've ever done which has been, sort*  
580 *of a learning curve, sort of unavoidable but sort of liberating at the same time.” P19, UK*

581 Alternatively, participants who were unable to access financial supports from family, friends,  
582 and partners described the negative impact of income instability on mental-emotional  
583 challenges and social inclusion:

584 *“My partner was not employed and currently is not employed. So that has been really*  
585 *stressful because it's basically ... they have to do everything for me now which they do*  
586 *and ... that's actually a bonus or like a positive environmental factor. Like I have live-in*  
587 *help. Like if I can't cook... I don't clean. I don't go grocery shopping.” P26, US*

588 Participants described social support from family and friends characterized by understanding,  
589 patience, acceptance, and open conversation, which alleviated disability:

590 *“I know seeing family is a great thing to pick me up if I'm not feeling great. They always*  
591 *make me smile. I think some of it is that you can't be sad around a two year old and a*  
592 *five year old...They're a good pick-me-up if I need ...” P30, UK*

593 Support from the Long COVID Community: Participants described how the **Long COVID**  
594 **community** was instrumental in alleviating disability by providing validation, emotional support,  
595 informational support, and practical living strategies to reduce their symptoms.

596 Participants described *'helping each other'* in the online support groups, with one participant  
597 stating, *“if it wasn't for the online community, I don't even know where I'd be... just being able*  
598 *to connect with people who believe you and are going through the same thing.” (P1, UK).*

599 Participants referred to the knowledge acquisition that occurred through support groups:

600            “[the group] saved me from getting a lot worse because it was on there that I found out  
601            all the information on their website...which was taking the advice on pacing for post viral  
602            illness and presenting it to long COVID patients...I have had to learn and educate  
603            myself.” P34, US

604            Nevertheless, some participants spoke about how engaging in support groups could potentially  
605            provoke an exacerbation of symptoms (e.g. PESE); as well as concern from reading about the  
606            potential of health-related challenges, highlighting the importance of finding a support group  
607            tailored to individual needs. This participant described an exacerbation of their symptoms after  
608            prolonged periods of time on social media and processing information:

609            “...those support networks. I’m constantly on Twitter. What I found though is... at one  
610            stage I was too engrossed in it and I was constantly scrolling. Then I found that actually I  
611            think that exacerbated my symptoms.” P4, UK

612            Finally, many participants referenced **positive social, emotional, and practical support from**  
613            **people living with other complex chronic illnesses and disability**, such as ME/CFS, and Postural  
614            Orthostatic Tachycardia Syndrome (POTS). Seeking support from others with shared  
615            disablement experiences provided a sense of support and understanding from others:

616            “I prefer to speak to people who have chronic illness because you’re not spending an  
617            hour explaining to somebody that you’re ill just because you look okay. So you’re already  
618            at that point where there’s a shared understanding.” P31, UK

619            Ultimately, finding a group of similar people, positive environment, resource and information  
620            sharing, opportunities to support others and reciprocate provided positive opportunities for  
621            connecting with others was essential.

622 Support from Knowledgeable Health and Rehabilitation Providers: Participants described both  
623 positive and negative experiences **from accessing health and rehabilitation providers** including  
624 pharmacological and non-pharmacological (rehabilitation) interventions, which alleviated and  
625 exacerbated dimensions of disability.

626 Participants described characteristics of health care providers that alleviated aspects of  
627 disability as collaborative, listeners, and having realistic expectations and humility. Many  
628 referred to the importance of collaborative health providers whereby patients and providers  
629 collectively *"talk and come up with an action plan"* (P11, Ireland), providers who could set  
630 realistic expectations, providers who may not have all the answers, but listened and  
631 acknowledged their health challenges. *"It really came down to a comfort level that me feeling  
632 that I'm being heard by that medical professional"* (P16, Canada).

633 Participants talked about the importance of providers **acknowledging their gaps in**  
634 **knowledge and helping patients navigate the uncertainty** around their condition, recognizing  
635 **the importance of a big picture, holistic approach**. Not all health providers were  
636 knowledgeable in Long COVID, passing the burden on navigating the health system to the  
637 individual participant:

638 *"My family doctor. She's very supportive but has no knowledge of post viral illness... very*  
639 *supportive in keeping me off work when I need it and listening to my needs. But not*  
640 *really coming up with any solutions besides just making sure that my blood tests are*  
641 *normal and making sure that I'm off work... almost all of the labour of finding adequate*  
642 *care has fallen on my shoulders. So I know the healthcare system. I know my way about*

643 *it. But I've had to be extremely proactive in finding my own care. If I hadn't I would still*  
644 *be doing labs with my family doctor and that would be it." P14, Canada*

645 Participants acknowledged the **limitations faced by providers** with respect to diagnostic and  
646 treatment options, which limited their ability to address their symptoms.

647 *"My GP is brilliant because I see him whenever I need to... There's not much he can do*  
648 *for me he said at the moment. I've had an MRI because I have fierce pain in my lungs*  
649 *here and I still do. Nothing showed up as usual with long COVID. Nothing shows up*  
650 *which is good and bad in some ways. I had cardiology appointments. I've been to the*  
651 *medical assessment unit in the hospital for a full checkup which was good and blood*  
652 *tests and x-rays as well... it's been good so far. Anything I've needed to get checked has*  
653 *been checked." P10, Ireland*

654 Participants particularly highlighted the **importance of health providers recognizing and**  
655 **understanding the episodic and multidimensional nature of disability:**

656 *"it would be great if the physio had more or whoever had more understanding of long*  
657 *COVID that the joint pain might be really bad today but it might be different tomorrow*  
658 *or your breathing might be okay today but tomorrow you could be really needing you*  
659 *know some breathing techniques .... instead of dealing with what's in front of them,*  
660 *sometimes they need to kind of have a bigger picture of the thing." P9, Ireland*

661 However, participants described tangible supports they received from health providers that  
662 helped to alleviate disability, in the absence of validated treatment, such as facilitating **access**  
663 **to mobility aids**, disability parking passes, assessments and providing **documentation to**

664 **facilitate access to income support for those unable to work.** Some highlighted **negative**  
665 **experiences** from receiving certain health and rehabilitation services, as this participant  
666 described their experience with a physiotherapist:

667 *“There’s no understanding... ‘push yourself, let’s go, I’m timing you, come faster at the*  
668 *stick.’ I’m like going ‘help, I can’t breathe here, I’m wobbling, just give me a chance’. And*  
669 *even when they’re talking to you, there’s so much information, you get lost in what’s*  
670 *happening. But you can’t ask them a question because your time is up and out you go.”*  
671 *P6, Ireland*

672 Support from Employers, Insurers, Human Resource Professionals, Work Colleagues: Participants  
673 described a range in the nature and extent of support received from employers in  
674 understanding and accommodating for their disability with Long COVID. Support came in the  
675 form of offering **flexible return-to-work models involving flexible or part-time hours** in  
676 accordance with their capacity; **and work from home** (if applicable).

677 *“Having a supportive boss has been huge... They were very understanding with sick days*  
678 *and being slower and they cut back hours... they really did a lot to try to help me stay in*  
679 *my job.” P26, US*

680 Participants described support from **work colleagues** who recognized their episodic nature of  
681 disability as having a positive influence on their disability:

682 *“All my colleagues know that on any given day I may just say no, I can’t do that and*  
683 *that’s all they need to hear. They’re also very understanding if I say I shouldn’t be*  
684 *included in that project or not, I won’t go to that meeting and I also say don’t expect me*



685 *to go to meetings alone... My colleagues are very good. They're not saying oh 'why can't*  
686 *you do that?', 'you're not pulling your weight'. No, that's been very good to have that*  
687 *understanding."* P15, US

688 **Poor understanding of Long COVID among employers and coworkers** exacerbated challenges  
689 engaging in work and employment. Participants at times were faced with having to choose  
690 between *"you can work or you can get better"* (P40, US), describing their struggle between their  
691 desire with their inability to work:

692 *"What people don't get about people with disabilities is that .... honestly if we could*  
693 *work, we would work. We need some support .... It's not that we don't want to work. It's*  
694 *that we really can't and so we need things that are tailored to us and have that flex*  
695 *time..."* P38, Canada

696 Nevertheless, participants discussed **flexibility of work as a privilege**; many referred to as  
697 feeling lucky, recognizing not everyone had the same opportunity to take time from work or  
698 flexible work hours or location: *"I also feel like privileged in the sense that I could like take this*  
699 *leave from my job to work on my wellness and that there is that like benefit and support from*  
700 *work".* P35, US

701 Program and policy, financial, income support, public health policies and mandates: Long COVID  
702 was characterized by a complex maze of program and income supports, resulting in barriers to  
703 accessing income support, further exacerbated by the complexity of recognizing Long COVID as  
704 a legitimate health condition resulting in disability.

705           **Program and policy support** for persons living with Long COVID, specifically **financial,**  
706 **income, or employment accommodation, benefits, insurance, and financial supports** in the  
707 form of disability helped mitigate financial uncertainty among participants living with Long  
708 COVID. Participants described the importance of a *'sufficient base income'* and access to  
709 income support in their country. They described the challenges of navigating the maze of  
710 disability (or illness) benefits, long-term disability insurance, short-term disability, health  
711 insurance, private insurance, social welfare, employment insurance, social security, and other  
712 forms of income support, and amounts, and the length of time in which they are accessible  
713 (short term versus long term disability); when unable to engage in employment; and the  
714 uncertainty surrounding eligibility of income support. Those with income support or benefits  
715 described a *'peace of mind'* alleviating financial uncertainty and worry.

716           Applying for benefits was time intensive and cognitively demanding involving multiple  
717 stages and duration to assessment, uncertainty of approval, and if denied involved a long  
718 appeal process. Participants spoke of the challenges with the length of time to access or apply  
719 for income support, the uncertainty of approval, and the limited funding that comes with  
720 disability support. Some faced difficulty accessing supports if they did not have a positive PCR  
721 test leaving them *'in a no-person's land'*.

722           *"The harshest period by far was when I was waiting for my disability, my long-term*  
723 *disability leave to be approved and when I had already run out of my sick bank. So that*  
724 *meant no income. That meant no benefits."* P25, Canada

725 For participants in their prime career and income-earning years, the process of applying for  
726 income support was described as stressful, raising the possibility that one *'wasn't going to get*

727 *better* and they *'don't want to go there'* as it meant an unwanted label as *'disabled'* and  
728 *'someone saying that you're not going to recover quickly'* was tied to potential long-term  
729 recovery, *"I couldn't consider applying for disability because I don't want to be disabled, I want*  
730 *to get better."* (P12, Ireland).

731 Participants described support from **public health, environmental and health policies** in  
732 the form of **vaccination and mask mandates**, access to testing, and official recognition of Long  
733 COVID as a disability. Some described barriers to accessing specialized Long COVID services,  
734 fraught with extended wait times, out of pocket expenses, ineligibility without a positive PCR  
735 test, and further barriers to those living in rural geographical regions, particularly in  
736 jurisdictions whereby insurance and employment policies did not recognize Long COVID as a  
737 disability.

738 *Mobility Aids and Technology:* Practical devices were instrumental to alleviating disability and  
739 facilitating engagement in day-to-day activities. Participants referred to **mobility aids**, access to  
740 **technology** including the **internet** and **wearables** and devices to assist in managing their health  
741 challenges. Participants described mobility aids, such as a cane or power wheelchair, as a  
742 mechanism to facilitate accessibility in the environment, independence and social participation.  
743 Access to the internet, and digital health technology (wearables, heart rate monitors, wireless  
744 physical activity monitors) was a path to better understand their symptoms and navigate their  
745 energy level.

746 *"The reason I got it [power wheelchair] is I literally feel trapped in the house. Like I can't*  
747 *walk more than like a few blocks without triggering you know PEM the next day...it*  
748 *definitely has a feeling of liberation now ... I don't feel so trapped... Still if I go*

749 *somewhere the cognitive and sensory overload might be too much. But now I can at*  
750 *least like think about it... whereas before I couldn't even entertain the idea of like going*  
751 *out with my partner..." P34, US*

752 Access to **internet, digital technology**, and a **telephone** were enablers for many, as this  
753 participant stated:

754 *"Having access to digital technology has been so important to get everything from*  
755 *ordering my food, speaking to the GP, getting a taxi to the hospital. So that's key is*  
756 *having a phone or an internet connection. Anyone that doesn't, their quality of life, I*  
757 *don't know how they would be able to deal with long COVID to be honest." P3, UK*

## 758 **A.2 - Accessibility of Environment and Health Services**

759 Participants described the **accessibility of the physical environment** and **geographical access to**  
760 **health care services** as an extrinsic contextual factor influencing disability. Participants  
761 required additional effort to navigate their environment due to physical or cognitive limitations:

762 *"I would never have noticed, thought about or realized pre COVID. You just thought*  
763 *there's a ramp, like wheelchair users can get in. It's the same with like dropped curbs.*  
764 *Everything is just a bit more of a challenge and you have to... it's kind of almost that*  
765 *extra cognitive effort to get anywhere because you have to be looking and aware of hold*  
766 *on a minute is that a good curb or a bad curb..." P30, UK*

767 Participants discussed **inaccessibility of the home environment**, which limited their mobility  
768 and ability to carry out day to day activities, particularly for those unable to navigate stairs:

769 *“Living in a place with stairs... it could be a challenge because I might go for weeks and*  
770 *weeks without being able to go on the stairs. But equally, if I’m more alright like having*  
771 *an up period, then having the stairs means I can do some physical activity you know,*  
772 *especially because I don’t go out as much.” P21, UK*

773 Access to health services was at times **geographically limited, particularly in rural or remote**  
774 **regions**. Services were often fraught with long wait times for specialized Long COVID care,  
775 limited to those with a positive PCR test, involved virtual care only, or required travel over long  
776 distances to appointments Some reported needing to break appointments into short intervals,  
777 making it difficult for providers to address the complexity of Long COVID.

778 *“I suppose, living in the country. Now like you have to drive to places. Trying to get to the*  
779 *hospital, I can’t drive myself to the hospital anymore because there’s no... services*  
780 *anywhere for long COVID anywhere near where I live. So I have to travel to Dublin for the*  
781 *clinic I’m attending. It’s not even a long COVID clinic. It’s under infectious diseases. But*  
782 *yeah, I have to get somebody to drive me there.” P35, Ireland*

783 This resulted in many having to **out of pocket expenses for private services, further**  
784 **exacerbating financial challenges**: *“I’m scared to add up the bills I have in terms of what I paid*  
785 *to GPs and consultants because I’ve had to go private to all of them... Otherwise I’d still be on*  
786 *indefinite waiting lists.” (P36, Ireland)*

### 787 **A.3 - Stigma and Epistemic Injustice**

788 **Stigma and epistemic injustice**, emerged as modifiable extrinsic factors that exacerbated  
789 experiences of disability. Stigma was enacted by family, friends, work colleagues, employers,

790 insurers and health care providers. Epistemic injustice [41-43] came in the form of invalidation,  
791 stigma, disbelief, and dismissal of symptoms and experiences with Long COVID. Participants  
792 spoke about the amount of time and energy spent convincing family, friends, doctors, insurance  
793 providers, and employers of their disability. They spoke of the challenges just *'to be believed'*,  
794 being labelled as *'dramatic'*, *'dismissed'*, *'brushed off'*, referred to as having *'anxiety'*, *'being*  
795 *told that the tests are fine, so just go away'* and made to *'feel like it's in your head and you're*  
796 *just lazy and you need to workout'*. The psychologizing of Long COVID exacerbated mental  
797 health challenges as this participant stated: *"The most stressful part of the whole journey of*  
798 *long COVID was fighting to be believed that I had COVID."* P1, UK

799 Epistemic injustice was **further compounded by gender, race, and age** whereby women  
800 who were younger referred to dismissive events by health providers as a *'middle class white*  
801 *ladies disease'*, *'malingerer riding on the coattails, or lazy'*, as this participant stated:

802 *"my initial attempts to get help were botched. I was told I was anxious. I was told that I*  
803 *was hiding a drug problem. I was told that it was menopause. So I couldn't get any kind*  
804 *of testing. I couldn't get anything done for a very long period of time. So I had no*  
805 *opportunity for early interventions. I was left alone... I don't have a healthcare plan in*  
806 *place."* P22, Canada

807 The **invisibility of Long COVID disability** posed challenges for participants. They described  
808 others often saw them as young and *'healthy-looking'* and therefore did not understand or  
809 acknowledge their disability. Participants spoke about how the most challenging aspects of  
810 their disability are often less visible:

811 *“it’s very difficult living with this invisible disability because people look at you and say*  
812 *‘oh well you look great’. ...but I’m all screwed up inside. I can’t walk around the block*  
813 *without getting chest pain... I haven’t picked up a vacuum cleaner for two years.” P29,*  
814 *Canada*

815 Participants referred to ignorance and dissonance among others towards Long COVID,  
816 describing the sense others feel: *“you must not be trying hard enough to get better”* you are  
817 *just...not trying hard enough” (P15, US) stating, “people don’t want to think that a viral infection*  
818 *can disable you perhaps for the rest of your life. I mean you had the flu and now you’re disabled,*  
819 *that’s it? ... people don’t want to recognize that reality.” (P15, US)*

820 See **S3 Table** for additional supportive quotes for extrinsic contextual factors and their  
821 influence on dimensions of disability.

## 822 **B - Intrinsic Contextual Factors**

823 Intrinsic factors were defined as modifiable and non-modifiable elements within an individual  
824 that may exacerbate or alleviate disability, and may also fluctuate over time.

### 825 **Living Strategies**

826 **Living strategies** included behaviors, attitudes and beliefs adopted to mitigate or deal with  
827 disability associated with Long COVID. Behaviours included: i) maintaining a sense of control  
828 over life and the condition, (anticipating and planning ahead for episodes such as pacing,  
829 establishing structure and routine; lifestyle strategies, and practical strategies); ii) seeking social  
830 and practical support and knowledge among participants living with Long COVID (seeking out  
831 knowledge, health services, and support from others)). Attitudes, beliefs, mindset and outlook  
832 living with Long COVID included: iii) acceptance, adaptation or adjustment of mindset, hope

833 and optimism (versus despair), and adopting new roles and purpose; and; iv) diverting or  
834 distracting from thoughts about living with Long COVID.

### 835 **B.1 - Maintaining Control over Health and Life**

836 Participants described efforts to maintain control over their health and life. Participants used  
837 strategies such as anticipating and planning for episodes of disability (pacing; establishing  
838 structure and routine); lifestyle changes; and practical strategies (task modification, tracking  
839 health with wearables, journaling) to reduce uncertainty, while living with an episodic and  
840 sometimes unpredictable condition.

841 **Pacing:** Pacing was a hallmark strategy used by participants to maintain control over their  
842 health. Pacing involved **anticipating, planning and preparing ahead** to prevent episodes of  
843 disability, specifically PESE, in order to maximize the ability for participants to engage in daily  
844 activities. Pacing was a learned skill, requiring the ability to anticipate and prepare for an  
845 episode of disability. Participants discussed how their knowledge evolved over time living with  
846 Long COVID to adopt strategies to better anticipate and prevent episodes of disability: “my  
847 *knowledge of how to manage fatigue conditions has improved massively*” (P8, Ireland).

848 Pacing involved carefully learning limits, **finding a balance between activity and rest,**  
849 **prioritizing, and establishing a structure and routine.** Participants referred to “*knowing how*  
850 *much I can push myself before I get to that level [of a crash]*”(P39, Canada). Participants noted  
851 that while their episodes of disability may diminish, it was not due to resolution of their Long  
852 COVID, but rather attributed to getting “*better at managing it and sort of preparing*” (P30, UK),  
853 to adopt pacing as a way to navigate and anticipate their ‘*energy envelope*’ day-to-day.



854 *“What’s interesting is it seems like the crashes have changed a little bit as I’ve gotten*  
855 *better at managing my energy like envelope where before I wouldn’t maybe realize a*  
856 *crash was coming until the next day and it would be really bad and last a couple days.”*

857 *P26, US*

858 While pacing and energy conservation was a necessary strategy, participants also spoke of the  
859 **consequences that pacing** had on their ability to work, engage in social activities (having to  
860 decline at last minute depending on energy level, uncertainty of crashes). Pacing sometimes  
861 involved **prioritization and sacrifice**, scaling back their activities to the bare minimum to  
862 manage their challenges with daily activities. While pacing was an essential skill for many, it was  
863 a **constant balancing act**, that also came at a cost on their productivity, satisfaction, and overall  
864 feelings of fulfillment.

865 *“There’s nothing more satisfying than being kind of in that flow state... where you’re just*  
866 *getting things out of your head, onto the page and you have no sense of time. That’s*  
867 *kind of like one of the best feelings...it’s been also one of the one’s that’s most likely to*  
868 *lead to a crash. So it’s such an experience to try to control and step out of what feels like*  
869 *emotionally satisfying work productivity a good thing because you know that*  
870 *repercussion-wise afterwards you’re going to be kind of brain dead. So kind of like*  
871 *making sure that you're breaking up time for me so I’m not so immersed. But that’s the*  
872 *opposite advice you would give anybody to be productive. So it really kind of gets...in*  
873 *your way.” P24, US*

874 Participants described the importance of **structure, routine** and **planning ahead** for the  
875 additional time required to carry out daily activities or social participation. **Having a structure**  
876 **and routine** included caring for others (kids; pets) and chores.

877 *"I keep a structure everyday and get up. Even though I'm going nowhere some days, I*  
878 *get up. I have my shower. I take two hours. I have breakfast. So I have a pattern. I*  
879 *started also which I thought is brilliant and helps my brain..." P6, Ireland*

880 For many, **planning ahead** was a new reality living with Long COVID in order to navigate the  
881 energy envelope in relation to the physical and cognitive and emotional demands of the day:

882 *"If I knew that I was going to be downstairs for most of the day...I take what I need from*  
883 *upstairs. So I've got everything laid out for downstairs. I think ahead about what I'm*  
884 *cooking or you know I'd cook with little stools so I'm sitting down for all of it." P1, UK*

885 Lifestyle strategies: Participants described lifestyle strategies to enhance aspects of their health  
886 within their control. Strategies including lifestyle changes such as, **changes to diet, purposeful**  
887 **rest including sleep, stretching, mindfulness, and taking up new life activities** creative or  
888 artistic in nature as a way to enhance *"satisfaction of realizing there's still something that I*  
889 *actually can do and I can create something... that's empowering."* (P36, Ireland)

890 Practical strategies: Participants described a series of **practical task-modification strategies**  
891 (e.g. using a shower chair, mobility aids using click-and-collect for groceries) and cognitive  
892 strategies including writing lists, sticky note reminders, breathing exercises (to decrease heart  
893 rate) and finding a quiet space to mitigate distraction.

894 Participants described **tracking** health trajectories using **wearables and other assistive**  
895 **devices** including **apps, trackers and wireless activity and heart rate monitors** to identify

896 **potential triggers and learn limits** to inform strategies of pacing. Participants described  
897 documenting or charting energy levels, using a dietary log, tracking medication use and using  
898 trial and error to identify what strategy worked, when and in what context:

899 *“I can track my meals because I wasn’t sure what foods were triggering me. I wasn’t sure*  
900 *whether it was a certain number of steps or a certain temperature outside or what you*  
901 *know amount of activity was too much. So I had to get really granular about it ... I went*  
902 *through a lot of trial and error with cutting out certain foods and cutting out a lot of*  
903 *foods, really limiting my activity to you know walks maybe at the ends of the day or even*  
904 *just tracking what chores I did that day whether it was just laundry or if I walked you*  
905 *know twice or whatever maybe....I was trying to find some kind of pattern... where I was*  
906 *getting better and better and better and then worse and worse and then better and then*  
907 *I could see what changes I made there and how I felt after each thing.” P2, US*

908 **Journaling** was also used as a way to document the Long COVID journey: *“I found that’s helped*  
909 *massively with my mental health. I close that book every day. That’s done and let’s get on with*  
910 *whatever has to be done you know.” (P6, Ireland)*

## 911 **B.2 - Seeking out knowledge, health services, and support from others**

912 Participants described **having to seek out information from community organizations and**  
913 **support groups and websites**, to learn about and from others living with Long COVID: *“it had to*  
914 *basically turn me into a scientist, and I’m not a scientist” (P27, Canada)*. This placed burden on  
915 the individual, as many were left having to seek out knowledge in order to help them navigate a  
916 complex and fragmented health system:

917 *“So I’ve tried to do a lot of my own research, tried to talk to a lot of the right people to*  
918 *figure out the best path forward or what’s the optimal testing strategy or self treatment*  
919 *strategy whether it’s lifestyle changes or medications or what have you, rather than*  
920 *getting brain scans and more invasive and expensive testing done.” P2, US*

921 Many eventually found themselves **seeking out support** from others, as this participant stated:

922 *“It sounds ridiculous but that’s actually a strategy that I would have avoided. ... I would*  
923 *inconvenience myself 10 times over rather than ask a friend to do something if it was going to*  
924 *be slightly difficult for them. Now I ask all the time.” (P17, US)*

925 Other participants discussed **avoiding interactions due to fears of crowds**, or unsupportive  
926 family, friends or health care providers, as this participant stated:

927 *“I’ve got family members that are like ‘you were really fit and active, like you can’t be*  
928 *still having symptoms’. I’ve got the point where I just don’t mention it anymore. I just*  
929 *think I don’t want to talk about it. I’ve only got a few close-knit friends that I will say I’m*  
930 *having a really bad day today.” P4, UK*

### 931 **B.3 - Attitudes, Beliefs, Mindset and Outlook**

932 Participants described emotion focused strategies in the absence of problem focused solutions  
933 in the form of **attitudes, beliefs, mindset** and **outlook** including acceptance; adapting or  
934 adjusting mindset (shifting goal setting, patience, self-awareness, resiliency, positioning self  
935 with others); hope and optimism (versus despair), adopting a positive and growth mindset; and  
936 adopting new roles and purpose living with their condition.

937 Acceptance: Participants referred to coming to terms living with Long COVID, accepting ‘*the*  
938 *new normal*’: “*It’s a huge psychological adjustment to switch to the place you need to be in*  
939 *order to actually be pacing and resting to the degree that is required to do any level of healing.*”  
940 (P3, UK)

941 Acceptance also came from the legitimization of knowledge that Long COVID was a  
942 legitimate pathophysiological health condition, removing personal burden and responsibility of  
943 their health trajectory beyond their control, stating it ‘*removes this very big weight off your*  
944 *shoulders*’ – “*removes the personal responsibility for getting better or not getting better.*” (P34,  
945 US). As this participant stated:

946  
947 “*I think in a weird way accepting the uncertainty is a freeing feeling because you kind of*  
948 *become less invested in like the outcome. But the actual feeling of the uncertainty is*  
949 *terrifying.*” P18, Canada

950 Some participants described elements of **internalized ableism**, describing their reluctance, to  
951 accept their condition, as this participant stated: “*doesn’t mean you like it....it’s just that ... this*  
952 *is your reality and what you need to work with.*” (P65, Canada)

953 Adapting or Adjusting Mindset: Participants referred to **adjusting or managing their goals and**  
954 **expectations**, to manage disappointment when unable to achieve expectations. One participant  
955 articulated acceptance embedded with adjustment of goals with optimism for Long COVID  
956 treatment:

957           *“Releasing that has given me a better quality of life... I do still have a lot of hope for*  
958           *treatments. I just no longer have hope that I’m going to suddenly wake up and be at pre*  
959           *illness levels.” (P34-US)*

960   Participants described **shifting or adapting their mindset** focusing on ‘*what one can do rather*  
961   *than cannot do*’. One participant discussed their focus “*changed very much from I need to beat*  
962   *this and get better and get back to normal, it changed from that to I need to now carve out a*  
963   *new normal.” (P31-UK). As this participant stated:*

964           *“It took me almost a year but realized that my identity as a working person is not who I*  
965           *am and the most important thing to do is take care of myself. Alongside that was kind of*  
966           *retraining my brain and body to not need stimulation... I used to really miss the runner’s*  
967           *high and to think like if I can’t go running it’s the worst thing in the world... I really*  
968           *struggled to go from that to doing nothing. But going from that to you know going for a*  
969           *long walk to going for a walk to looking at plants outside, that was much more like*  
970           *helpful and long term as more of like a harm reduction thing that got me to the same*  
971           *place eventually” P17, US*

972   Participants described **adapting expectations** to make a fulfilling and meaningful life with their  
973   health challenges; adapting to new reality; ‘*not trying to get to your old self and just go ahead*  
974   *and after this long just adapting to the current situation*’ and ‘*coming up with a new game*  
975   *plan.*’ Participants **redefined success** by celebrating small achievements, as this participant  
976   described: “*I have tried really hard to celebrate the things that I could like do this week that I*  
977   *couldn’t do last week and try to find like creative ways to participate in the things that mean a*  
978   *lot to me.” (P40, US).*

979 Participants referred to **shifting their goal setting**, or avoiding goal setting to avoid  
980 disappointment. As this participant stated *“I’m not setting goals because I’m just trying to say  
981 just get through this and just get through this and I don’t look too far ahead now”* (P9, Ireland).

982 Finally, many referred to the value of **patience**: Participants stated: *‘part of my journey I  
983 guess is patience’*. and *“It’s more like my body isn’t catching up even though sometimes inside I  
984 feel like I’m normal again.”* (P23, US). For participants, living with long COVID for a longer  
985 period of time, they described an **enhanced self-health awareness and re-prioritization of  
986 health**. As this participant stated:

987 *“The weirdest thing about the whole thing is that I feel like I like myself now better. I  
988 don’t know if it’s because what I’ve gone through is so painful that I feel like I see the  
989 world in a different way and it makes me feel like a better person. ... I feel lucky that I  
990 went through it at this age because I see the world so differently now. But it’s also made  
991 a lot of things that I used to care about I realize like oh those things don’t matter you  
992 know. So it makes me feel like my priorities are a little bit more aligned.”* P17, US

993 One participant discussed *‘being more honest with myself about how my symptoms are in  
994 control or not’* (P17, US). Others specifically referred to **resiliency and taking every day as it  
995 comes**, such as *‘getting on with it’*, *‘can’t just sit around and hope for something that may never  
996 come’* (P16, Canada) and *‘there’s no point worrying about what’s ahead because you don’t  
997 know’* (P10, Ireland).

998 *Hope and Optimism; Positive and Growth Mindset*: Participants described attitudes **hope and  
999 optimism** stating *“It’s not going to last forever’* and *‘this will pass’*, possessing a **positive  
1000 mindset** that comes from listening to your body and finding joy in small things as part of their

1001 trajectory. Participants referred to **hope and optimism** living with Long COVID as an  
1002 **opportunity for regrowth and taking on new roles** in the future ahead:

1003 *“there’s this like type of pinecone that the seeds will only sprout if there’s been a fire.*  
1004 *You actually have to have a forest fire for like the seeds to come out. I feel like my life*  
1005 *has like burnt to the ground ... if I like look at it I’m a disabled single mom. Like it’s not*  
1006 *something I ever wanted in my 40s. But at the same time I’m becoming an advocate.*  
1007 *Maybe I’m not going to get in the same... I had a lot of value in my job but I have lots of*  
1008 *other talents. It’s a way of like completely regrowing my life from the start and there’s*  
1009 *nothing left... I get a chance to start over again which most people don’t get, they’re*  
1010 *kind of stuck in the rut of their life of what they chose. So I’m trying to see it as an*  
1011 *opportunity to really spend the next half of my life with a lot of meaning... making*  
1012 *meaningful choices and doing things that are meaningful...Long COVID is an opportunity*  
1013 *in some ways. I’m not saying I’m not sad but it’s an opportunity to reinvent myself in*  
1014 *some ways which you don’t.” P14, Canada*

1015 Nevertheless, participants also described the episodic nature of their outlook, articulating the  
1016 struggle between optimism and despair:

1017 *“I’m struggling everyday to just be okay with where I’m at and accept it because it is*  
1018 *what it is and you know digging deep resilience-wise and to all the skills ...But this isn’t*  
1019 *who I want to be or where I want to be...I’m not living my life or certainly not living my*  
1020 *best life. I’m just managing. I’m just surviving. I’m just dealing with... and I’m also very*  
1021 *grateful to have survived or to be here at all. So just trying to manage that balance.”*  
1022 *P12, Ireland*



1023 Adopting New Roles and Purpose: Some participants described **finding new purpose** by  
1024 participating in the Long COVID movement, taking on the role as **knowledge broker, and**  
1025 **advocate**. Participants described educating themselves and **fostering education, knowledge**  
1026 **transfer and exchange** among others living with Long COVID, health care providers, and  
1027 educating the general public about Long COVID, and providing support in and among Long  
1028 COVID communities.

1029 *“I found helping other people when I could really helped at a time when I wasn’t*  
1030 *working... what I’m trying to say it helped with my self-esteem and it helped me like a*  
1031 *purpose. I feel good about.” P10, Ireland*

1032 Participants described taking on the role of researcher, enhancing patient engagement in  
1033 research as a strategy to advance science in Long COVID; providing empowerment, and  
1034 advancing the science in the field. Information sharing among others living with Long COVID,  
1035 support groups, sharing one’s personal lived experiences and tips was referred to as *“taking the*  
1036 *power back”* offering empowerment, and sense of purpose, pride, meaning and self-worth  
1037 through the acquisition and sharing of knowledge of Long COVID, validation of symptoms, and  
1038 learning from conditions such as ME/CFS who have been *‘doing it for decades’*.

#### 1039 **B.4 - Diverting or Distracting**

1040 Some participants described strategies of diverting or distracting them from living with Long  
1041 COVID, blocking their condition out of the mind, immersing themselves in activities such as  
1042 listening to music, walking, drawing, or playing video games for stress relief, to *“try not to think*  
1043 *that I’m going to get back to pre-COVID days you know.” (P17, US)*. Some described using

1044 substances such as alcohol as a '*coping mechanism*' stating they were careful to ensure it did  
1045 not '*become a crutch*'.

1046 **Personal Attributes**

1047 Personal attributes including **sex, gender identity, age, ethnicity, and pre-existing and**  
1048 **concurrent health conditions** were described as potentially influencing dimensions of disability.

1049 Participants discussed risk factors of **sex and gender** on Long COVID '*there does seem to be a*  
1050 *hormonal aspect here and women of all ages have reported that.*' (P31, UK) Women described  
1051 how Long COVID disrupted their menstrual cycles with random or absent periods; how  
1052 menstruation triggered an episode of disability; and uncertainty about their ability to have  
1053 children in the future. Some participants discussed the dependency of women on their partners  
1054 for practical and financial support increasing the risk of gender violence in context of Long  
1055 COVID. Some women participants discussed the dismissal of their Long COVID symptoms by  
1056 health providers as '*probably your hormones*', or characterizing women as being '*dramatic*'.

1057 **Younger participants** described expectations from others about recovery and living with  
1058 disability and Long COVID, whereby if younger in age, the impression was that they should be  
1059 able to '*bounce back faster*' and "*the expectation that I should be able to just deal with it ... the*  
1060 *feedback constantly was about you're young, you're fit, you should be fine.* (P3, UK).

1061 Participants discussed **ethnicity**, intersecting with education and employment,  
1062 intertwined with the broader environmental, political and social context influencing disability  
1063 with Long COVID. Participants who identified as white acknowledged their privilege, which may  
1064 come as an advantage of access to and believed by health care providers:

1065 *“I definitely think being white [ethnicity] has been helpful to me in terms of being*  
1066 *believed for my symptoms. I think being really educated and the job that I had ... has also*  
1067 *been helpful for being believed with my symptoms.” P26, US*

1068 Finally, living with **pre-existing and other health conditions** may further exacerbate disability: “I  
1069 *really see it just as being something that I’ve already had as a weakness in me and that the*  
1070 *COVID has just brought that out.” (P8, Ireland). Some viewed Long COVID as an exacerbation of*  
1071 *previous illnesses or conditions. Finally, **COVID characteristics** such as having a positive PCR or*  
1072 *positive antigen test offered validation and credibility with health providers. The **length of time***  
1073 ***living with Long COVID** provided time to establish living strategies (e.g. pacing) in order to*  
1074 *mitigate or prevent episodes of disability.*

1075 See **S3 Table** for supportive quotes for intrinsic contextual factors and their influence on  
1076 dimensions of disability.

1077

## 1078 **Framework Component C – Triggers**

1079 Triggers of disability were defined as moments, stimuli, or events that initiated episodes  
1080 of disability. Examples included physical or cognitive exertion, environmental triggers, stressful  
1081 or emotional life events, re-infection of COVID-19, vaccines, menstruation, type or amount of  
1082 food, medications, and other health conditions or illnesses (**Fig 9**). The presence of one trigger  
1083 and its influence on dimensions of disability could interact with and influence another trigger,  
1084 resulting in a cascade (or accumulation) of triggers exacerbating disability over time.

1085

1086 **Fig 9. Examples of Triggers of Disability in the Episodic Disability Framework.** Triggers of  
1087 disability include moments, stimuli, or events that may initiate an episode of disability (either  
1088 immediate or delayed in timeframe).

1089  
1090 Participants described **physical exertion** as a trigger of PESE, such as walking, showering,  
1091 climbing stairs, cleaning, driving, or trying to *‘fight through it’* or *‘push through this thing’* only  
1092 to find *“to my own detriment that pushing through doesn’t work. It just makes me worse, way*  
1093 *worse...” (P14, Ireland)*. Another participant described **exercise as a trigger** of an episode of  
1094 worsening disability:

1095 *“I kept trying to walk everyday and I kept trying to exercise because you’d start feeling a*  
1096 *bit better, you’d do a little bit more and then you’d crash and then you’d start feeling a*  
1097 *bit better and you’d do a little bit more and you’d crash. I didn’t recognize that as a cycle*  
1098 *because to be honest.” P29, Canada*

1099 **Cognitive exertion** such as *‘reading or filling out forms’ (P26, US)* additionally could exacerbate  
1100 disability in the form of PESE. **Mental and emotional exertion** described as *‘stressful*  
1101 *conversations’* and the *‘severity, duration or frequency of stress’* were also conceptualized as  
1102 triggers of disability; as this participant stated: *“Stress is a big one which is hard because it’s*  
1103 *stressful being sick.” (P26, US)*. Exertion in social situations were also described as potential  
1104 triggers, as this participant stated:

1105 *“Socializing. So we met with my partner’s sister... for lunch and I literally couldn’t string a*  
1106 *sentence together on the drive home. I had to go into bed and sleep for a couple*  
1107 *two/three hours afterwards because I was just completely and physically exhausted ... it*

1108 *wasn't even anything... it wasn't a hard-going lunch. It was just a catch-up with them.*

1109 *But yeah, it just completely wiped me out." P5, UK*

1110 Others described **environmental triggers**, such as warm or cold weather, sunlight, ambient

1111 noise, smoke, loud noises, pollen or mold. Others referred to alcohol, certain foods and

1112 dehydration, lack of sleep, as a trigger. Some participants were unable to identify triggers, and

1113 described triggers as '*unpredictable*':

1114 *"You could be just about managing a little bit above your baseline and then it could be*

1115 *something like emptying the dishwasher ...So you do that and then that can be the*

1116 *straw...it's lots of things. It's physical, mental, cognitive, psychological, all sorts of effort*

1117 *and your energy is not constant. It varies from day-to-day as well which makes it even*

1118 *harder because I can get through some days and I can surprise myself and go oh actually*

1119 *I did three things and I'm okay. But there are days where you know you might do half a*

1120 *thing and that will be enough. So yeah, there are fluctuations." P31, UK*

1121 Some kept a diary to try to understand potential triggers. Over time, participants developed a

1122 better understanding of potential triggers and how to prevent or anticipate and plan for an

1123 episode.

1124

## 1125 **Discussion**

1126 Findings indicate the Episodic Disability Framework (EDF) is applicable to

1127 conceptualizing disability in the context of Long COVID. Results indicate disability experienced

1128 by adults living with Long COVID is multi-dimensional, characterized by the potential dynamic,

1129 progressive, and recurrent fluctuating nature of disability that may occur daily (within the

1130 course of a day), or over time. Episodic disability involves a variable path from illness to  
1131 wellness after initial, and sometimes recurrent COVID-19 infection. This aligns with recent  
1132 recognition of Long COVID as a disabling condition [44], and the critical need to extend social  
1133 supports and policies grounded within a disablement framework, informed by people living  
1134 with disabilities as a basis for progressive change [45].

## 1135 **Episodic Disability Framework – Conceptual Foundation in Long COVID**

1136 Components of the Episodic Disability Framework align with, and represent disability,  
1137 specifically dimensions, contextual factors and triggers of disability experienced within the  
1138 context of Long COVID. The Framework encompasses physical and cognitive health challenges  
1139 documented among persons living with Long COVID [13, 16, 46, 47], and provides a conceptual  
1140 foundation to categorize the nature (types) of disability experienced by adults living with Long  
1141 COVID.

1142 In this iteration of the Episodic Disability Framework, we separated ‘symptoms and  
1143 impairments’ from the original framework into distinct dimensions of physical, cognitive and  
1144 mental-emotional health challenges [24]. A notable feature of episodic disability in the context  
1145 of Long COVID in this study was PESE or PEM which transcended physical, cognitive and mental-  
1146 emotional dimensions, highlighting the ability of the framework to encompass critical features  
1147 of disability experienced in the context of Long COVID. PESE is a common symptom of Long  
1148 COVID, whereby disability can be triggered by physical, cognitive, mental, social or emotional  
1149 exertions, that were previously tolerated [40]. Exacerbation of symptoms can occur 24-72 hours  
1150 after exertion, characterized by the framework as a temporal delay in exacerbation of disability.  
1151 However, not all dimensions of disability were experienced as episodic. Some were more stable

1152 or persistent, with fluctuating severity and trends of improvement or deterioration over time,  
1153 highlighting the range of disability experiences and the importance of considering trajectories  
1154 of distinct dimensions of disability, as not all challenges are episodic or of equal severity and  
1155 duration.

1156           Uncertainty, was a key dimension of disability with Long COVID [45]. Living with  
1157 uncertainty can refer to concerns of whether recovery was possible among adults with Long  
1158 COVID [48]. We found similar features of uncertainty with others living with chronic episodic  
1159 conditions pertaining to the source of health challenges, episodic nature, uncertainty of health  
1160 care providers knowledge and skills, and financial uncertainty [49]. Findings from this study  
1161 emphasized the leadership among online community support groups and others with lived  
1162 experiences, who have been instrumental in providing support to persons living with  
1163 uncertainty, addressing health challenges and facilitating access to health services [50-52]. As  
1164 evidence continues to emerge on the long-term trajectory of Long COVID [53, 54], uncertainty  
1165 should be recognized as an integral component of disability experienced among individuals  
1166 living with Long COVID.

1167           Living strategies, analogous to the concept of coping, was a prominent intrinsic factor of  
1168 the framework. This highlights the resourcefulness of the Long COVID community in seeking out  
1169 and sharing knowledge, to learn, adapt and provide support in the absence of medical  
1170 interventions to cure Long COVID [52, 55, 56], and aligns with evidence documenting persons  
1171 with Long COVID have more adaptive approaches to coping [57-59]. Some participants adopted  
1172 pacing, a positive outlook, adjusted their life expectations, and adopted new goals and self-  
1173 identity among those in the community [59]. Nevertheless, the extensive strategies elicited by

1174 participants in this study should not suggest that the burden of responsibility fall to the  
1175 individual with self-management living with Long COVID [60], but rather highlight the  
1176 importance of the collaborative approach between patients and providers to recognize and  
1177 help mitigate, manage, or prevent disability.

1178 Extrinsic factors such as epistemic injustice may be considered analogous to gaslighting,  
1179 stigma and discrimination experienced by persons with Long COVID [61, 62]. While this concept  
1180 spans extrinsic (enacted stigma) and intrinsic (self-doubt, internalized stigma), we allocated  
1181 epistemic injustice collectives as an extrinsic factor noting that intrinsic aspects of epistemic  
1182 injustice are captured in the attitudes, beliefs, mindset and outlook as part of the ‘living  
1183 strategies’ in the Framework [62].

1184 Finally, this work suggests that dimensions, contextual factors and triggers interact with  
1185 and influence each other, and that they can potentially accumulate, exacerbating disability over  
1186 time. While we are unable to distinguish the direction of the relationships, we anticipate they  
1187 are bidirectional.

## 1188 **Implications for Practice, Research and Policy**

1189 The Episodic Disability Framework provides a way to conceptualize episodic disability  
1190 and help to facilitate recognition of disability as a consequence of Long COVID, with the aim to  
1191 foster safe and effective rehabilitation care, treatments and strategies, disability justice and  
1192 support [63]. Persons living with Long COVID may use the framework to better articulate their  
1193 experiences to care providers, employers, and insurers. Clinicians can use the framework to  
1194 guide disability assessment. Modifiable contextual factors, including living strategies employed  
1195 by persons living with Long COVID, represent possible targets for interventions to prevent or



1196 mitigate exacerbations of disability. Employers, insurers and policy stakeholders can use the  
1197 Framework to yield accommodations in the workplace, and more flexible income, labour force  
1198 and employment policies and programs [64]. Utilizing this existing framework developed from,  
1199 and validated with others living with episodic illness, offer a new way to more broadly  
1200 conceptualise disability experienced among persons living with Long COVID and other complex  
1201 chronic conditions, to more broadly raise the understanding of episodic disability and its  
1202 implications for rehabilitation [23, 26, 65-67].

### 1203 **Strengths and Limitations**

1204         Strengths of this study included our international and community-engaged approach,  
1205 involving persons with lived experiences of Long COVID across five community networks in four  
1206 countries. This work builds on a strong conceptual foundation and an academic-community-  
1207 clinical collaboration embedded in the field of episodic disability and rehabilitation [26].  
1208 Recruiting through community collaborator organizations by team members with experiences  
1209 of Long COVID resulted in equal representation across the four countries in the large sample of  
1210 40 participants. This study involves English-speaking persons from high income countries; the  
1211 majority of who were women, white, and living with Long COVID for more than a year, and able  
1212 to participate in an online interview, hence participants may not reflect the broader population  
1213 of adults or children living with Long COVID. Finally, the linkages between dimensions of  
1214 episodic disability and contextual factors are descriptive in nature, and while the participants  
1215 implied associations between these dimensions, we do not have data to suggest directional,  
1216 nor causal relationships. Further research is needed to examine the strength and direction of

1217 relationships between dimensions, contextual factors, and triggers of disability to target  
1218 interventions to prevent or mitigate disability.

1219

## 1220 **Conclusions**

1221           The Episodic Disability Framework conceptualizes the experiences of disability among  
1222 adults living with Long COVID including dimensions, contextual factors and triggers of disability.  
1223 Features include the multidimensional and episodic nature of disability, uncertainty as a key  
1224 dimension, contextual factors that can exacerbate or alleviate disability and triggers that  
1225 initiate episodes of disability. This framework provides a conceptual foundation from which to  
1226 advance future measurement of disability and areas to target approaches for health and  
1227 rehabilitation services and interventions in Long COVID.

1228

## 1229 **Acknowledgements**

1230           We thank the participants for their contributions to this study and the community  
1231 organizations who collaborated in this work. We acknowledge the following community  
1232 collaborator organizations who were instrumental in this work: the Patient-Led Research  
1233 Collaborative (PLRC), Long COVID Physio, Long COVID Support UK, COVID Long Haulers Support  
1234 Group Canada, Long COVID Advocacy Ireland, and Long COVID Ireland. We thank Laura Bassi,  
1235 FisioCamera for their contributions to the Figures. We thank Sarah O’Connell, Long COVID  
1236 Advocacy Ireland for their role in the Long COVID and Episodic Disability study.

1237

## 1238 **References**

1239

1240 1. Nalbandian A, Sehgal K, Gupta A, Madhavan MV, McGroder C, Stevens JS, et al. Post-acute

1241 COVID-19 syndrome. *Nature medicine*. 2021. Epub 2021/03/24. doi: 10.1038/s41591-021-

1242 01283-z. PubMed PMID: 33753937.

1243 2. Chen C, Hauptert SR, Zimmermann L, Shi X, Fritsche LG, Mukherjee B. Global Prevalence of

1244 Post COVID-19 Condition or Long COVID: A Meta-Analysis and Systematic Review. *The*

1245 *Journal of infectious diseases*. 2022. Epub 20220416. doi: 10.1093/infdis/jiac136. PubMed

1246 PMID: 35429399; PubMed Central PMCID: PMC9047189.

1247 3. Soriano JB, Murthy S, Marshall JC, Relan P, Diaz JV, Condition WHO Clinical Case Definition

1248 Working Group on Post-COVID-19 Condition. A clinical case definition of post-COVID-19

1249 condition by a Delphi consensus. *The Lancet infectious diseases*. 2021. Epub 2021/12/25.

1250 doi: 10.1016/S1473-3099(21)00703-9. PubMed PMID: 34951953; PubMed Central PMCID:

1251 PMC9047189.

1252 4. Callard F, Perego E. How and why patients made Long Covid. *Soc Sci Med*.

1253 2021;268:113426. Epub 2020/11/18. doi: 10.1016/j.socscimed.2020.113426. PubMed

1254 PMID: 33199035; PubMed Central PMCID: PMC7539940.

1255 5. Altmann DM, Whettlock EM, Liu S, Arachchilage DJ, Boyton RJ. The immunology of long

1256 COVID. *Nat Rev Immunol*. 2023;23(10):618-34. Epub 20230711. doi: 10.1038/s41577-023-

1257 00904-7. PubMed PMID: 37433988.

1258 6. Wulf Hanson S, Abbafati C, Aerts JG, Al-Aly Z, Ashbaugh C, Ballouz T, et al. A global

1259 systematic analysis of the occurrence, severity, and recovery pattern of long COVID in

1260 2020 and 2021. *medRxiv : the preprint server for health sciences*. 2022. Epub 20220527.

- 1261 doi: 10.1101/2022.05.26.22275532. PubMed PMID: 35664995; PubMed Central PMCID:  
1262 PMCPMC9164454.
- 1263 7. Kuang S, Earl S, Clarke J, Zakaria D, Demers A, Aziz S. Experiences of Canadians with long-  
1264 term symptoms following COVID-19. Available from:  
1265 <https://www150.statcan.gc.ca/n1/pub/75-006-x/2023001/article/00015-eng.htm>.
- 1266 8. Office for National Statistics. Self-reported coronavirus (COVID-19) infections and  
1267 associated symptoms, England and Scotland: November 2023 to March 2024. 2024.  
1268 Accessed May 6, 2024. Available from:  
1269 <https://www.ons.gov.uk/peoplepopulationandcommunity/healthandsocialcare/condition>  
1270 [sanddiseases/articles/selfreportedcoronaviruscovid19infectionsandassociatedsymptomse](https://www.ons.gov.uk/peoplepopulationandcommunity/healthandsocialcare/condition/sanddiseases/articles/selfreportedcoronaviruscovid19infectionsandassociatedsymptomse)  
1271 [nglandandscotland/november2023tomarch2024](https://www.ons.gov.uk/peoplepopulationandcommunity/healthandsocialcare/condition/sanddiseases/articles/selfreportedcoronaviruscovid19infectionsandassociatedsymptomse/nglandandscotland/november2023tomarch2024).
- 1272 9. Ford ND, Agedew A, Dalton AF, Singleton J, Perrine CG, Saydah S. Notes from the Field:  
1273 Long COVID Prevalence Among Adults - United States, 2022. MMWR Morbidity and  
1274 mortality weekly report. 2024;73(6):135-6. PubMed PMID: Medline:38359012.
- 1275 10. The Lancet. Long COVID: 3 years in. Lancet. 2023;401(10379):795. doi: 10.1016/S0140-  
1276 6736(23)00493-2. PubMed PMID: 36906338; PubMed Central PMCID: PMCPMC9998094.
- 1277 11. O'Mahoney LL, Routen A, Gillies C, Ekezie W, Welford A, Zhang A, et al. The prevalence  
1278 and long-term health effects of Long Covid among hospitalised and non-hospitalised  
1279 populations: A systematic review and meta-analysis. EClinicalMedicine. 2023;55:101762.  
1280 Epub 20221201. doi: 10.1016/j.eclinm.2022.101762. PubMed PMID: 36474804; PubMed  
1281 Central PMCID: PMCPMC9714474.

- 1282 12. Cutler DM. The Costs of Long COVID. JAMA Health Forum. 2022;3(5):e221809. Epub  
1283 20220506. doi: 10.1001/jamahealthforum.2022.1809. PubMed PMID: 36219031.
- 1284 13. Ceban F, Ling S, Lui LMW, Lee Y, Gill H, Teopiz KM, et al. Fatigue and cognitive impairment  
1285 in Post-COVID-19 Syndrome: A systematic review and meta-analysis. Brain, behavior, and  
1286 immunity. 2022;101:93-135. Epub 20211229. doi: 10.1016/j.bbi.2021.12.020. PubMed  
1287 PMID: 34973396; PubMed Central PMCID: PMC8715665.
- 1288 14. Ziauddeen N, Gurdasani D, O'Hara ME, Hastie C, Roderick P, Yao G, et al. Characteristics  
1289 and impact of Long Covid: Findings from an online survey. PloS one.  
1290 2022;17(3):e0264331. Epub 20220308. doi: 10.1371/journal.pone.0264331. PubMed  
1291 PMID: 35259179; PubMed Central PMCID: PMC8903286.
- 1292 15. Monteiro IP, Appelt PA, Sisconetto AT, Minare Baldo Sucupira KS, Bazan R, Luvizutto GJ, et  
1293 al. Post-coronavirus disease 2019 functional impairments, limitations, and restrictions: A  
1294 prospective cohort study based on the international classification of functioning,  
1295 disability, and health. J Cent Nerv Syst Dis. 2023;15:11795735231195759. Epub 20230819.  
1296 doi: 10.1177/11795735231195759. PubMed PMID: 38025402; PubMed Central PMCID:  
1297 PMC8903286.
- 1298 16. Davis HE, Assaf GS, McCorkell L, Wei H, Low RJ, Re'em Y, et al. Characterizing long COVID  
1299 in an international cohort: 7 months of symptoms and their impact. EClinicalMedicine.  
1300 2021. doi: <https://doi.org/10.1016/j.eclinm.2021.101019>.
- 1301 17. Wong TL, Weitzer DJ. Long COVID and Myalgic Encephalomyelitis/Chronic Fatigue  
1302 Syndrome (ME/CFS)-A Systemic Review and Comparison of Clinical Presentation and  
1303 Symptomatology. Medicina (Kaunas). 2021;57(5). Epub 20210426. doi:

- 1304 10.3390/medicina57050418. PubMed PMID: 33925784; PubMed Central PMCID:  
1305 PMCPMC8145228.
- 1306 18. Stussman B, Williams A, Snow J, Gavin A, Scott R, Nath A, et al. Characterization of Post-  
1307 exertional Malaise in Patients With Myalgic Encephalomyelitis/Chronic Fatigue Syndrome.  
1308 Front Neurol. 2020;11:1025. Epub 20200918. doi: 10.3389/fneur.2020.01025. PubMed  
1309 PMID: 33071931; PubMed Central PMCID: PMCPMC7530890.
- 1310 19. Hartle M, Bateman, L, Vernon, S.D. Dissecting the nature of post-exertional malaise.  
1311 Fatigue: Biomedicine, Health & Behavior. 2021;9(1):33-44.
- 1312 20. Pendergrast T, Brown A, Sunnquist M, Jantke R, Newton JL, Strand EB, et al. Housebound  
1313 versus nonhousebound patients with myalgic encephalomyelitis and chronic fatigue  
1314 syndrome. Chronic illness. 2016;12(4):292-307. Epub 20160428. doi:  
1315 10.1177/1742395316644770. PubMed PMID: 27127189; PubMed Central PMCID:  
1316 PMCPMC5464362.
- 1317 21. Castro-Marrero J, Faro M, Zaragoza MC, Aliste L, de Sevilla TF, Alegre J. Unemployment  
1318 and work disability in individuals with chronic fatigue syndrome/myalgic  
1319 encephalomyelitis: a community-based cross-sectional study from Spain. BMC public  
1320 health. 2019;19(1):840. Epub 20190628. doi: 10.1186/s12889-019-7225-z. PubMed PMID:  
1321 31253111; PubMed Central PMCID: PMCPMC6599355.
- 1322 22. World Health Organization. International classification of functioning, disability and  
1323 health (ICF). Geneva.: The World Health Organization; 2001.

- 1324 23. Brown DA, O'Brien KK. Conceptualising Long COVID as an episodic health condition. *BMJ*  
1325 *Glob Health*. 2021;6(9). Epub 2021/09/24. doi: 10.1136/bmjgh-2021-007004. PubMed  
1326 PMID: 34551971; PubMed Central PMCID: PMC8460526.
- 1327 24. O'Brien KK, Bayoumi AM, Strike C, Young NL, Davis AM. Exploring disability from the  
1328 perspective of adults living with HIV/AIDS: development of a conceptual framework.  
1329 *Health Qual Life Outcomes*. 2008;6:76. Epub 2008/10/07. doi: 1477-7525-6-76 [pii]  
1330 10.1186/1477-7525-6-76. PubMed PMID: 18834538.
- 1331 25. O'Brien KK, Davis AM, Strike C, Young NL, Bayoumi AM. Putting episodic disability into  
1332 context: a qualitative study exploring factors that influence disability experienced by  
1333 adults living with HIV/AIDS. *J Int AIDS Soc*. 2009;12(1):5. Epub 2009/11/11. doi: 1758-  
1334 2652-2-5 [pii]  
1335 10.1186/1758-2652-2-5. PubMed PMID: 19900284.
- 1336 26. Brown DA, O'Brien KK, Josh J, Nixon SA, Hanass-Hancock J, Galantino M, et al. Six Lessons  
1337 for COVID-19 Rehabilitation From HIV Rehabilitation. *Phys Ther*. 2020;100(11):1906-9.  
1338 Epub 2020/08/02. doi: 10.1093/ptj/pzaa142. PubMed PMID: 32737967; PubMed Central  
1339 PMCID: PMC7454859.
- 1340 27. O'Brien KK, Brown DA, McDuff K, St Clair-Sullivan N, Solomon P, Chan Carusone S, et al.  
1341 Conceptualising the episodic nature of disability among adults living with Long COVID: a  
1342 qualitative study. *BMJ Glob Health*. 2023;8(3). doi: 10.1136/bmjgh-2022-011276. PubMed  
1343 PMID: 36863719; PubMed Central PMCID: PMC9979585.
- 1344 28. O'Brien KK, Brown DA, Bergin C, Erlandson KM, Vera JH, Avery L, et al. Long COVID and  
1345 episodic disability: advancing the conceptualisation, measurement and knowledge of

- 1346 episodic disability among people living with Long COVID - protocol for a mixed-methods  
1347 study. *BMJ Open*. 2022;12(3):e060826. Epub 20220307. doi: 10.1136/bmjopen-2022-  
1348 060826. PubMed PMID: 35256450; PubMed Central PMCID: PMC8905414.
- 1349 29. McCorkell L, G SA, H ED, Wei H, Akrami A. Patient-Led Research Collaborative: embedding  
1350 patients in the Long COVID narrative. *Pain Rep*. 2021;6(1):e913. Epub 20210413. doi:  
1351 10.1097/PR9.0000000000000913. PubMed PMID: 33987484; PubMed Central PMCID:  
1352 PMC8112577.
- 1353 30. Long COVID Physio. Long COVID Physio - <https://longcovid.physio/> [https://www.physio-  
1354 pedia.com/Long\\_COVID2021](https://www.physio-<br/>1354 pedia.com/Long_COVID2021). Available from: <https://lnk.bio/YUiz>.
- 1355 31. Patient-Led Research Collaborative. Patient-Led Research Collaborative -  
1356 <https://patientresearchcovid19.com/> 2021. Available from:  
1357 <https://patientresearchcovid19.com/>
- 1358 32. COVID Long Haulers Support Group Canada (Goulding). COVID Long Haulers Support  
1359 Group Canada - <https://covidlonghaulcanada.com/> 2021. Available from:  
1360 <https://covidlonghaulcanada.com/>.
- 1361 33. Long COVID Support. Long COVID Support - <https://www.longcovid.org/> 2021. Available  
1362 from: <https://www.longcovid.org/>.
- 1363 34. Long COVID Ireland. Long COVID Ireland - <https://www.longcovidireland.org/>  
1364 <https://www.longcovidireland.org/2021> [December 31, 2021]. Available from:  
1365 <https://www.longcovidireland.org/>.



- 1366 35. Long COVID Advocacy Ireland - <https://longcovidadvocacyireland.com/>. Long COVID  
1367 Advocacy Ireland 2024 [cited 2024 May 6, 2024]. Available from:  
1368 <https://longcovidadvocacyireland.com/>.
- 1369 36. Zoom Health Care Video Communications Inc. Zoom Health Care Video Communications.  
1370 2020.
- 1371 37. Qualtrics. Qualtrics. In: Available from: <http://www.qualtrics.com>, editor. Provo, Utah,  
1372 USA2017.
- 1373 38. Hsieh HF, Shannon SE. Three approaches to qualitative content analysis. Qual Health Res.  
1374 2005;15(9):1277-88. Epub 2005/10/06. doi: 15/9/1277 [pii]  
1375 10.1177/1049732305276687. PubMed PMID: 16204405.
- 1376 39. QSR International. NVivo qualitative data analysis software. Version 12. 2018.
- 1377 40. National Institute for Health and Care Excellence (NICE). Myalgic encephalomyelitis (or  
1378 encephalopathy)/chronic fatigue syndrome: diagnosis and management. 2021.
- 1379 41. Blease C, Carel H, Geraghty K. Epistemic injustice in healthcare encounters: evidence from  
1380 chronic fatigue syndrome. J Med Ethics. 2017;43(8):549-57. Epub 20161205. doi:  
1381 10.1136/medethics-2016-103691. PubMed PMID: 27920164.
- 1382 42. Carel H, Kidd IJ. Epistemic injustice in healthcare: a philosophical analysis. Med Health Care  
1383 Philos. 2014;17(4):529-40. doi: 10.1007/s11019-014-9560-2. PubMed PMID: 24740808.
- 1384 43. Heggen KM, Berg H. Epistemic injustice in the age of evidence-based practice: The case of  
1385 fibromyalgia. Hum Soc Sci Commun. 2021;8(1). doi: ARTN 235  
1386 10.1057/s41599-021-00918-3. PubMed PMID: WOS:000707584600004.

- 1387 44. U.S. Department of Health Human Services Office for Civil Rights and U.S. Department of  
1388 Justice Human Services Civil Rights Division Disability Rights Section. Guidance on “Long  
1389 COVID” as a Disability Under the ADA, Section 504, and Section 15572021. Available from:  
1390 [https://www.hhs.gov/civil-rights/for-providers/civil-rights-covid19/guidance-long-covid-](https://www.hhs.gov/civil-rights/for-providers/civil-rights-covid19/guidance-long-covid-disability/index.html)  
1391 [disability/index.html](https://www.hhs.gov/civil-rights/for-providers/civil-rights-covid19/guidance-long-covid-disability/index.html).
- 1392 45. Ireson J, Taylor A, Richardson E, Greenfield B, Jones G. Exploring invisibility and epistemic  
1393 injustice in Long Covid-A citizen science qualitative analysis of patient stories from an  
1394 online Covid community. *Health expectations : an international journal of public*  
1395 *participation in health care and health policy.* 2022;25(4):1753-65. Epub 20220512. doi:  
1396 10.1111/hex.13518. PubMed PMID: 35557480; PubMed Central PMCID:  
1397 PMCPMC9327841.
- 1398 46. Thaweethai T, Jolley SE, Karlson EW, Levitan EB, Levy B, McComsey GA, et al.  
1399 Development of a Definition of Postacute Sequelae of SARS-CoV-2 Infection. *JAMA.*  
1400 2023;329(22):1934-46. doi: 10.1001/jama.2023.8823. PubMed PMID: 37278994; PubMed  
1401 Central PMCID: PMCPMC10214179.
- 1402 47. Davis HE, McCorkell L, Vogel JM, Topol EJ. Long COVID: major findings, mechanisms and  
1403 recommendations. *Nat Rev Microbiol.* 2023. Epub 20230113. doi: 10.1038/s41579-022-  
1404 00846-2. PubMed PMID: 36639608.
- 1405 48. Kingstone T, Taylor AK, O'Donnell CA, Atherton H, Blane DN, Chew-Graham CA. Finding  
1406 the 'right' GP: a qualitative study of the experiences of people with long-COVID. *BJGP*  
1407 *Open.* 2020;4(5). Epub 20201215. doi: 10.3399/bjgpopen20X101143. PubMed PMID:  
1408 33051223; PubMed Central PMCID: PMCPMC7880173.

- 1409 49. Solomon P, O'Brien K, Wilkins S, Gervais N. Aging with HIV and disability: the role of  
1410 uncertainty. *AIDS Care*. 2014;26(2):240-5. Epub 2013/06/27. doi:  
1411 10.1080/09540121.2013.811209. PubMed PMID: 23799874.
- 1412 50. Luscher J, Scholz U, Bierbauer W. Social support, distress and well-being in individuals  
1413 experiencing Long-COVID: a cross-sectional survey study. *BMJ Open*. 2023;13(3):e067166.  
1414 Epub 20230322. doi: 10.1136/bmjopen-2022-067166. PubMed PMID: 36948566; PubMed  
1415 Central PMCID: PMCPMC10039976.
- 1416 51. Macpherson K, Cooper K, Harbour J, Mahal D, Miller C, Nairn M. Experiences of living with  
1417 long COVID and of accessing healthcare services: a qualitative systematic review. *BMJ*  
1418 *Open*. 2022;12(1):e050979. Epub 20220111. doi: 10.1136/bmjopen-2021-050979.  
1419 PubMed PMID: 35017239; PubMed Central PMCID: PMCPMC8753091.
- 1420 52. Russell D, Spence NJ, Chase JD, Schwartz T, Tumminello CM, Bouldin E. Support amid  
1421 uncertainty: Long COVID illness experiences and the role of online communities. *SSM*  
1422 *Qual Res Health*. 2022;2:100177. Epub 20221004. doi: 10.1016/j.ssmqr.2022.100177.  
1423 PubMed PMID: 36212783; PubMed Central PMCID: PMCPMC9531408.
- 1424 53. Sivan M, Parkin A, Makower S, Greenwood DC. Post-COVID syndrome symptoms,  
1425 functional disability, and clinical severity phenotypes in hospitalized and nonhospitalized  
1426 individuals: A cross-sectional evaluation from a community COVID rehabilitation service.  
1427 *Journal of medical virology*. 2022;94(4):1419-27. Epub 20211123. doi:  
1428 10.1002/jmv.27456. PubMed PMID: 34783052; PubMed Central PMCID:  
1429 PMCPMC8661751.

- 1430 54. Appelman B, Charlton BT, Goulding RP, Kerkhoff TJ, Breedveld EA, Noort W, et al. Muscle  
1431 abnormalities worsen after post-exertional malaise in long COVID. *Nat Commun.*  
1432 2024;15(1):17. Epub 20240104. doi: 10.1038/s41467-023-44432-3. PubMed PMID:  
1433 38177128; PubMed Central PMCID: PMCPMC10766651.
- 1434 55. Aghaei A, Aggarwal A, Zhang R, Li X, Qiao S. Resilience resources and coping strategies of  
1435 COVID-19 female long haulers: A qualitative study. *Front Public Health.* 2022;10:970378.  
1436 Epub 20221104. doi: 10.3389/fpubh.2022.970378. PubMed PMID: 36407988; PubMed  
1437 Central PMCID: PMCPMC9672809.
- 1438 56. Hung P, Brehon K, Miciak M, Brown DA, Bostick G, Brown C, et al. "I Had to Know About It,  
1439 I Had to Find It, I Had to Know How to Access it": Experiences of Access to Rehabilitation  
1440 Services Among People Living with Long COVID. *Physiotherapy Canada Physiotherapie*  
1441 *Canada.* 2024;76(1):8-24. PubMed PMID: Medline:38465303.
- 1442 57. Re'em Y, Stelson, E.A., Davis, H.E., McCorkell, L, Wei, H. Assaf, G., Akrami, A. . Factors  
1443 associated with psychiatric outcomes and coping in Long COVID. *Nature Mental Health.*  
1444 2023;1:361-72. doi: <https://doi.org/10.1038/s44220-023-00064-6>.
- 1445 58. Hossain MM, Das J, Rahman F, Nesa F, Hossain P, Islam AMK, et al. Living with "long  
1446 COVID": A systematic review and meta-synthesis of qualitative evidence. *PloS one.*  
1447 2023;18(2):e0281884. Epub 20230216. doi: 10.1371/journal.pone.0281884. PubMed  
1448 PMID: 36795701; PubMed Central PMCID: PMCPMC9934341.
- 1449 59. Goodridge D, Lowe TN, Cai S, Herriot FN, Silverberg RV, Heynen M, et al. "We're drowning  
1450 and we're alone": a qualitative study of the lived experience of people experiencing  
1451 persistent post-COVID-19 symptoms. *CMAJ Open.* 2023;11(3):E504-E15. Epub 20230613.

- 1452 doi: 10.9778/cmajo.20220205. PubMed PMID: 37311595; PubMed Central PMCID:  
1453 PMCPMC10270655.
- 1454 60. Brown K, Yahyouche A, Haroon S, Camaradou J, Turner G. Long COVID and self-  
1455 management. *Lancet*. 2022;399(10322):355. doi: 10.1016/S0140-6736(21)02798-7.  
1456 PubMed PMID: 35065779; PubMed Central PMCID: PMCPMC8776283.
- 1457 61. Au L, Capotescu C, Eyal G, Finestone G. Long covid and medical gaslighting: Dismissal,  
1458 delayed diagnosis, and deferred treatment. *SSM Qual Res Health*. 2022;2:100167. Epub  
1459 20220907. doi: 10.1016/j.ssmqr.2022.100167. PubMed PMID: 36092770; PubMed Central  
1460 PMCID: PMCPMC9448633.
- 1461 62. Clutterbuck D, Ramasawmy, M., Pantelic, M., Hayer, J., Begum, F., Faghy, M., Nasir, N.,  
1462 Causer, B., Heightman, M., Allsopp, G., Wootton, D., Khan, M.A., Hastie, C., Jackson, M.,  
1463 Rayner, C., Brown, D., Parrett, E., Jones, G., Clarke, R., Mcfarland, S., Gabbay, M.,  
1464 Banerjee, A., Alwan, N.A., the STIMULATE-ICP Consortium, . Barriers to healthcare access:  
1465 findings from a co-produced Long Covid case-finding study. *MedRxiv preprint*. doi:  
1466 <https://doi.org/10.1101/2024.01.03.24300767>.
- 1467 63. Ziegler S, Raineri A, Nittas V, Rangelov N, Vollrath F, Britt C, et al. Long COVID Citizen  
1468 Scientists: Developing a Needs-Based Research Agenda by Persons Affected by Long  
1469 COVID. *The patient*. 2022. Epub 20220428. doi: 10.1007/s40271-022-00579-7. PubMed  
1470 PMID: 35478078; PubMed Central PMCID: PMCPMC9046008.
- 1471 64. Stelson EA, Dash D, McCorkell L, Wilson C, Assaf G, Re'em Y, et al. Return-to-work with  
1472 long COVID: An Episodic Disability and Total Worker Health(R) analysis. *Soc Sci Med*.

- 1473 2023;338:116336. Epub 20231020. doi: 10.1016/j.socscimed.2023.116336. PubMed  
1474 PMID: 37918226.
- 1475 65. O'Brien KK, Hanna S, Gardner S, Bayoumi AM, Rueda S, Hart TA, et al. Validation of the  
1476 Episodic Disability Framework with adults living with HIV. *Disabil Rehabil.* 2014;36(4):319-  
1477 29. Epub 2013/05/22. doi: 10.3109/09638288.2013.793408. PubMed PMID: 23688295.
- 1478 66. O'Brien KK, Bergin C, Solomon P, O'Dea S, Forde C, Vajravelu S. Cross-cultural applicability  
1479 of the episodic disability framework with adults living with HIV in Ireland: a qualitative  
1480 study. *Disabil Rehabil.* 2019:1-12. Epub 2019/06/05. doi:  
1481 10.1080/09638288.2019.1621395. PubMed PMID: 31161816.
- 1482 67. Owens B. How "long covid" is shedding light on postviral syndromes. *BMJ.*  
1483 2022;378:o2188. Epub 20220921. doi: 10.1136/bmj.o2188. PubMed PMID: 36130797.

1484

1485

## 1486 **Supporting Information**

1487 **S1 File - Interview Guide - Episodic Disability and Long COVID Study**

1488 **S2 Table – Dimensions of Disability in the Episodic Disability Framework in the Context of**

1489 **Long COVID - Supportive Quotes (n=40 participants)**

1490 **S3 Table – Contextual Factors (Extrinsic and Intrinsic) in the Episodic Disability Framework**

1491 **with Adults Living with Long COVID - Supportive Quotes (n=40 participants)**

1492

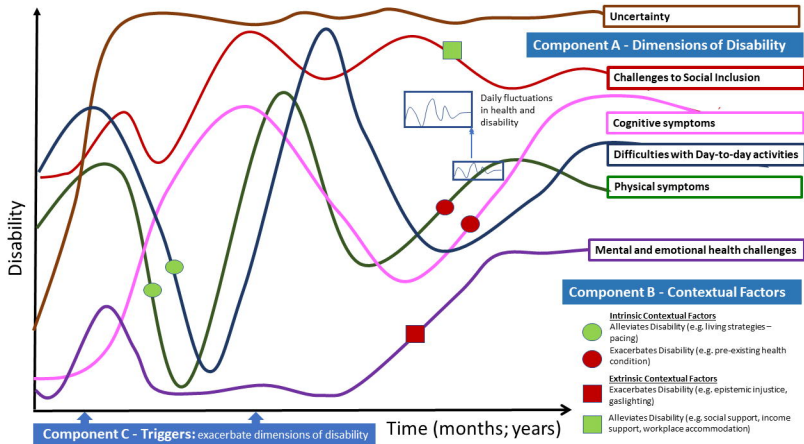

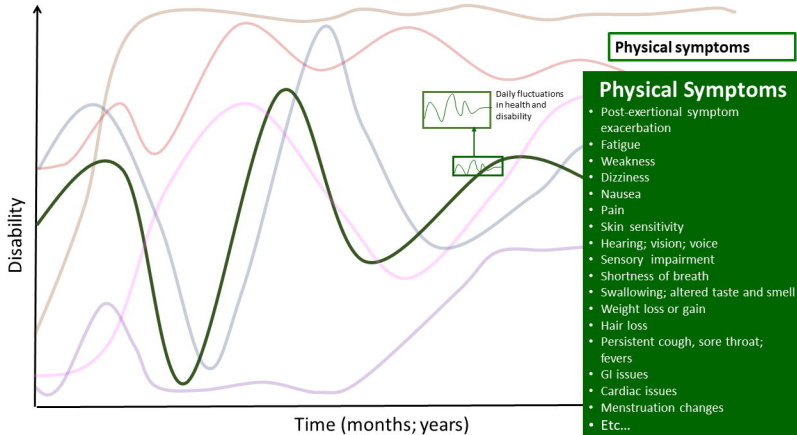



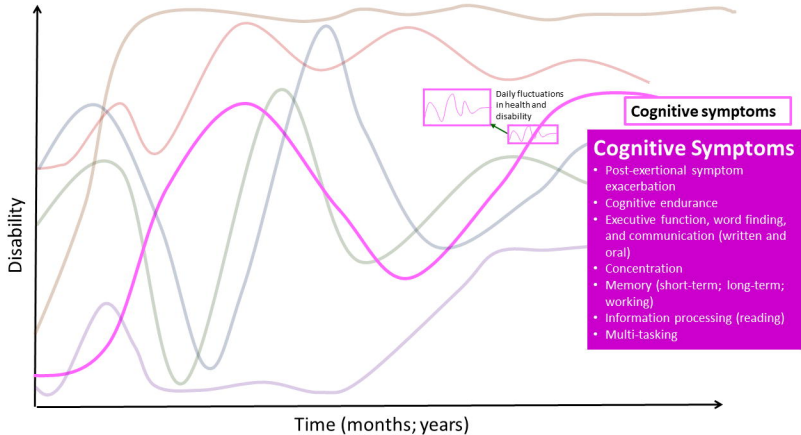

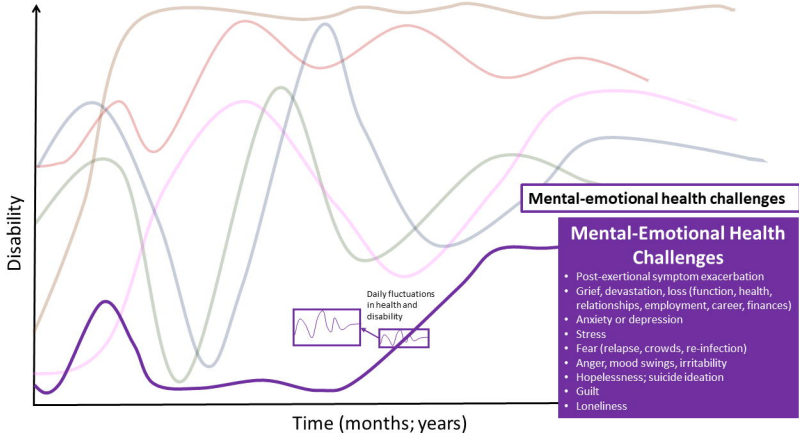

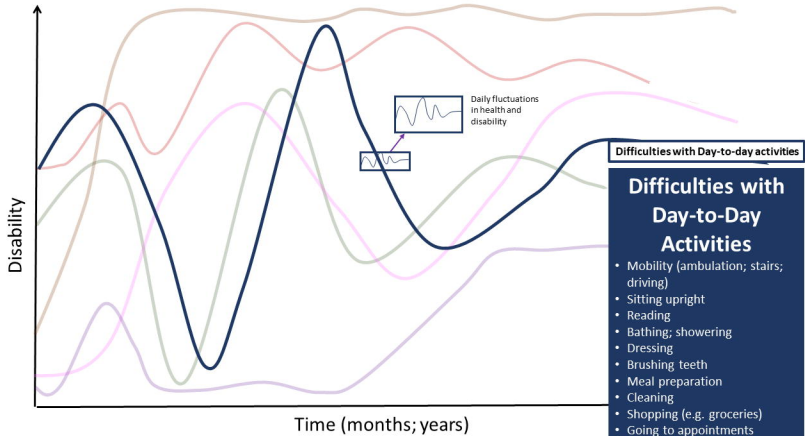

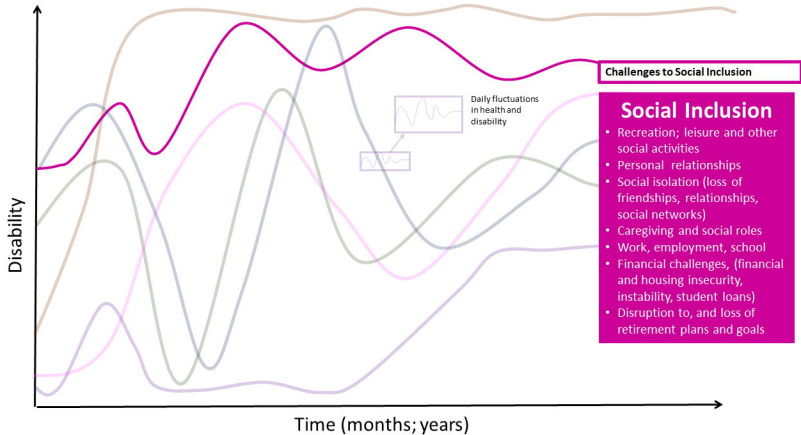

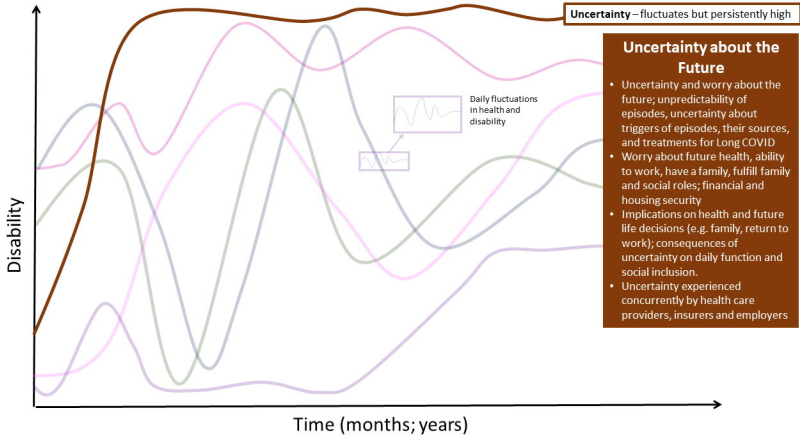

# Contextual Factors

Interact with and influence dimensions of disability

## Extrinsic Factors

### Support

- Practical, emotional and social support from:
  - Friends, family, partners
  - Long COVID Community (including other disability and post viral condition groups and communities)
- Health and rehabilitation services and providers
- Employers; insurers, human resource professionals, work colleagues
- Program, policy, income (financial) support (public health policies /mandates)
- Mobility aids, technology

### Accessibility of Environment & Health Services

- Access to health services and providers

### Stigma, Epistemic Injustice

- Invisibility of Long COVID disability;
- Gas lighting by Health providers

## Intrinsic Factors

### Living Strategies

#### Maintaining Control over Health & Life

- Pacing - anticipating, planning and Preparing Ahead; finding balance between activity and rest; prioritizing; establishing structure and routine;
- Lifestyle strategies;
- Practical Strategies (task modification tracking health; wearables, journaling)

#### Seeking out social and practical support, knowledge, health services and supports

Versus avoiding interactions with others; isolating self

#### Attitudes; Beliefs; Mindset; Outlook

- Acceptance,
- Adapting or adjusting mindset (shifting, adapting, and managing goals and expectations; patience; self-awareness; redefining success; resiliency, taking every day as it comes)
- Hope and optimism; positive and growth mindset (opportunity for growth) versus despair
- Adopting new roles and purpose

#### Diverting or Distracting

Blocking out of mind.

### Personal Attributes

- Sex; Gender
- Age
- Ethnicity
- Pre-existing and concurrent Health Conditions
- COVID Characteristics (Positive PCR test; length of time living with Long COVID)

## Time: Trajectory of Disability Living with Long COVID

Re-Infection with  
COVID-19

Stressful or  
emotional life  
events

Other health  
conditions or  
illness

Environmental Triggers  
(e.g. weather, sunlight,  
noise, smoke, noises,  
pollen)

Exertion  
Physical, cognitive,  
mental

Food

Medications

Vaccines (triggered  
relapses or  
improvements)

Menstruation

## Triggers of Disability

Moments, stimuli, or events that initiated exacerbation or alleviation in episodes of disability
